# Supplementary material
Source: PubMed Central journal article supplement (PMC4018115)

## EXPERIMENTAL

The detergent-free recombinant IN protein was produced in *Escherichia coli* and purified as previously described.<sup>1</sup> All oligonucleotides were synthesized by the phosphoramidite method on an automatic ABI 3400 DNA synthesizer (Applied Biosystems, USA) under conditions recommended by manufacturer and purified by electrophoresis in a 20% polyacrylamide/7 M urea gel. Modified oligonucleotides were additionally purified by RP-HPLC with acetonitrile gradient in 0.1 M ammonium acetate (pH 7). HPLC purification was carried out on AKTA Purifier equipped with Jupiter C18 or C5 column (Phenomenex, size 4.6\*250 mm, 5  $\mu$ m) with UV-Vis detector. Analytical HPLC was carried out on Agilent 1200 equipped with Ultasphere octyl (Beckman Coulter, size 4.6\*250 mm, 5  $\mu$ m), 45°C 1 ml/min with diode array detector. 5'-FAM, FAM, TET, HEX phosphoramidites were purchased from Metkinen Chemistry Oy; dT, dA(Bz), dG(iBu), dC(Ac), ddR, 1,3-propanediol phosphoramidites and dT p-methyl phosphoramidite - from ChemGenes, JOE phosphoramidite – from Primetech LLC. Oligonucleotides with eosin and oleic acid at 3'-end were synthesized as described previously.<sup>2</sup> Phosphorothioate oligonucleotides were synthesized accordingly to Krotz et al.<sup>3</sup> Oligonucleotides with methylphosphonate linkages were synthesized as described by Arnold and coworkers.<sup>4</sup> MALDI MS spectra were registered on AutoFlex (Bruker Вфдецтшсы) using 2,4,6-trihydroxyacetophenone/ ammonium citrate<sup>5</sup> or 3-hydroxypicolinic acid/ ammonium citrate<sup>6</sup> as a matrix.

**3'-Processing activity assay.** A DNA duplex consisting of oligonucleotides U5B (5'-GTGTGGAAAATCTCTAGCAGT-3') and U5A (5'-ACTGCTAGAGATTTTCACAC-3'), and mimicking the end of the HIV-1 U5 LTR was used as an IN substrate. The U5B oligonucleotide (10 pmol) was labeled with T4 polynucleotide kinase (Fermentas, Lithuania) and 50  $\mu$ Ci [ $\gamma$ -<sup>32</sup>P]ATP (3000 Ci/mmol). After 1 h of incubation at 37°C, the T4 polynucleotide kinase was inactivated by the addition of EDTA followed by heating at 65°C for 5 minutes. The U5B oligonucleotide was then annealed with an equimolar amount of complementary oligonucleotide, U5A. The resulting U5B/U5A duplex was then purified from unincorporated [ $\gamma$ -<sup>32</sup>P]ATP by centrifugation through MicroSpin G-25 Columns (GE Healthcare, UK). The <sup>32</sup>P-labeled substrate, U5B/U5A (3 nM), was

incubated in 20 µl of 20 mM Hepes, pH 7.2, 7.5 mM MgCl<sub>2</sub>, 1 mM DTT with 50 nM IN, in the presence of increasing concentrations of an oligonucleotide inhibitor (0.01-10 µM) at 37°C for 2 h. The reaction was stopped by adding 80 µl of a stop solution (7 mM EDTA, 0.3 M sodium acetate, 10 mM Tris-HCl, pH 8). IN was extracted by phenol/chloroform, and DNA fragments were precipitated with ethanol. The reaction products were suspended in loading dye (80% formamide, 0.05% bromophenol blue, 0.05% xylene cyanol) and separated by electrophoresis in a 20% polyacrylamide/7 M urea gel. Gel images were recorded on a STORM 840<sup>TM</sup> PhosphorImager (Molecular Dynamics, USA) and quantified with Image QuANT<sup>TM</sup> 4.1 software (USA).

## REFERENCES

1. Leh, H.; Brodin, P.; Bischerour, J.; Deprez, E.; Tauc, P.; Brochon, J. C.; Le Cam, E.; Coulaud, D.; Auclair, C.; Mouscadet, J. F. Determinants of Mg<sup>2+</sup>-dependent activities of recombinant human immunodeficiency virus type 1 integrase. *Biochemistry* **2000**, *39*, 9285-9294.
2. Prikazchikova, T. A.; Volkov, E.; Zubin, E. M.; Romanova, E.; Gottikh, M. HIV-1 integrase inhibition by modified oligonucleotides: optimization of the inhibitor structure. *Mol. Biol. (Moscow)* **2007**, *41*, 130-138.
3. Krotz, A. H.; Gorman, D.; Mataruse, P.; Foster, C.; Godbout, J. D.; Coffin, C. C.; Scozzari, A. N. Phosphorothioate Oligonucleotides with Low Phosphate Diester Content: Greater than 99.9% Sulfurization Efficiency with “Aged” Solutions of Phenylacetyl Disulfide (PADS). *Org. Proc. Res. Dev.* **2004**, *8*, 852-858.
4. Hogrefe, R. I.; Reynolds, M. A.; Vaghefi, M. M.; Young, K. M.; Riley, T. A.; Klem, R. E.; Arnold, L. J. An improved method for the synthesis and deprotection of methylphosphonate oligonucleotides. *Methods Mol. Biol.* **1993**, *20*, 143-164.
5. Zhu, Y. F.; Chung, C. N.; Taranenko, N. I.; Allman, S. L.; Martin, S. A.; Haff, L.; Chen, C. H. The study of 2,3,4-trihydroxyacetophenone and 2,4,6-trihydroxyacetophenone as matrices for DNA detection in matrix-assisted laser desorption/ionization time-of-flight mass spectrometry. *Rapid Commun. Mass Spectrom.* **1996**, *10*, 383-388.

6. Bentzley, C. M.; Johnston, M. V.; Larsen, B. S.; Gutteridge, S. Oligonucleotide Sequence and Composition Determined by Matrix-Assisted Laser Desorption /Ionization. *Anal. Chem.* **1996**, *68*, 2141-2146.

**Table 1.** MALDI MS analysis of the oligonucleotides used in the study.

| N  | Conjugate                    | Calculated mass, M+H <sup>+</sup> | Found mass, M+H <sup>+</sup> |
|----|------------------------------|-----------------------------------|------------------------------|
| 1  | <b>11D-E</b>                 | 4269.3                            | 4270.4                       |
| 2  | <b>11D-E2</b>                | 4091.2                            | 4091.4                       |
| 3  | <b>5'-FAM1-11D</b>           | 4035.8                            | 4036.6                       |
| 4  | <b>5'- FAM2-11D</b>          | 3924.7                            | 3923.9                       |
| 5  | <b>11D-3'-FITC</b>           | 3953.7                            | 3954.2                       |
| 6  | <b>HEX-11D</b>               | 4129.4                            | 4130.2                       |
| 7  | <b>HEX<sub>Acr</sub>-11D</b> | 4128.4                            | 4126.3                       |
| 8  | <b>TET-11D</b>               | 4060.4                            | 4060.2                       |
| 9  | <b>JOE-11D</b>               | 4049.6                            | 4049.4                       |
| 10 | <b>11D-Ole</b>               | 3860.8                            | 3860.9                       |
| 11 | <b>FAM-11D-Ole</b>           | 4511.4                            | 4512.4                       |
| 12 | <b>11D- FAM-Ole</b>          | 4511.4                            | 4512.4                       |
| 13 | <b>11DX-E-1</b>              | 4263.4                            | 4264.2                       |
| 14 | <b>11DX-E-2</b>              | 4263.4                            | 4263.9                       |
| 15 | <b>11DX-E-3</b>              | 4263.4                            | 4264.2                       |
| 16 | <b>11DS-E-1</b>              | 4430.0                            | 4432.9                       |
| 17 | <b>11DS-E-2</b>              | 4301.5                            | 4302.7                       |
| 18 | <b>11DS-E-3</b>              | 4301.5                            | 4304.0                       |
| 19 | <b>11DS-E-4</b>              | 4301.5                            | 4299.5                       |
| 20 | <b>HEX-11-ddR</b>            | 2788.3                            | 2788.6                       |
| 21 | <b>HEX-11D-ddR-1</b>         | 3334.7                            | 3337.9                       |
| 22 | <b>HEX-11D-ddR-2</b>         | 3334.7                            | 3335.2                       |
| 23 | <b>HEX-11-PD</b>             | 2368.0                            | 2368.9                       |
| 24 | <b>HEX-11D-PD-1</b>          | 3082.5                            | 3082.1                       |
| 25 | <b>HEX-11D-PD-2</b>          | 3082.5                            | 3083.1                       |
| 26 | <b>11M-E</b>                 | 4501.4                            | 4501.6                       |
| 27 | <b>HEX-11M</b>               | 4129.3                            | 4361.9                       |
| 28 | <b>HEX-11MS</b>              | 4538.2                            | 4537.1                       |
| 29 | <b>HEX-11MS-Ole</b>          | 5029.8                            | 5028.5                       |

11D-E

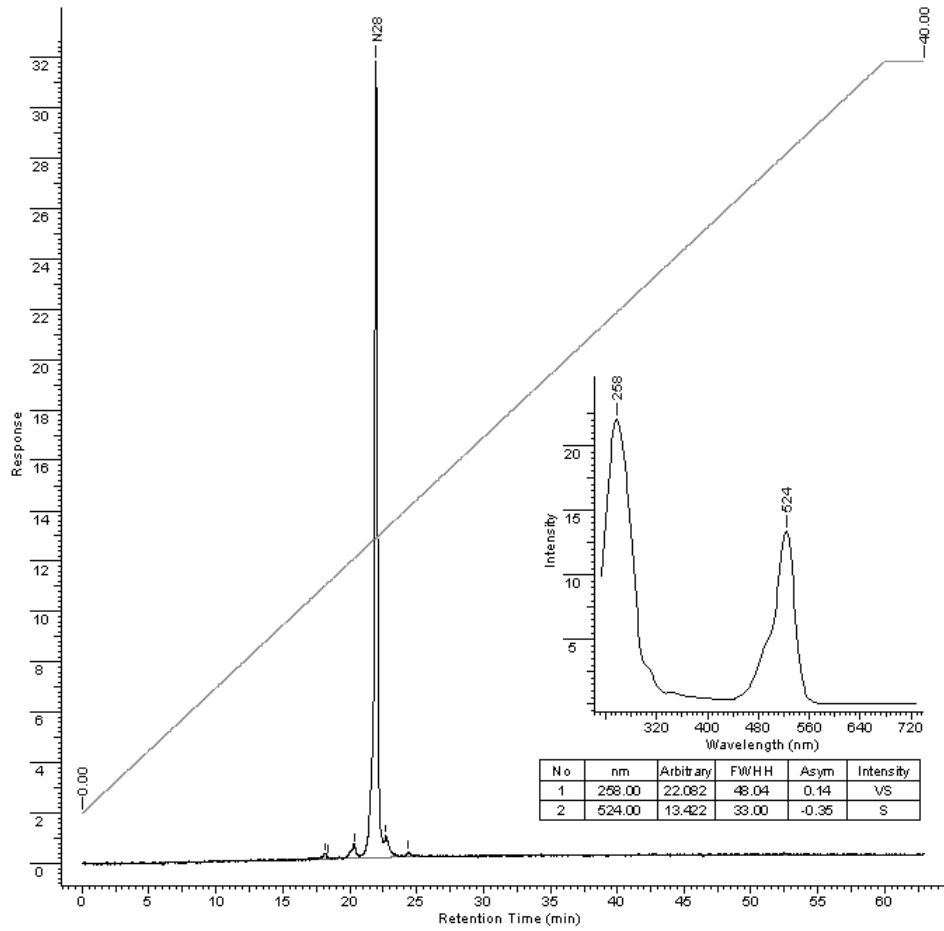

| Name | tR     | Peak Area (Y units/ms) | Area Percent | Width | Asymmetry | Resolution | Plate Number |
|------|--------|------------------------|--------------|-------|-----------|------------|--------------|
| N28  | 21.968 | 500927.625             | 91.924       | 0.318 | 1.000     | 1.531      | 76157.781    |

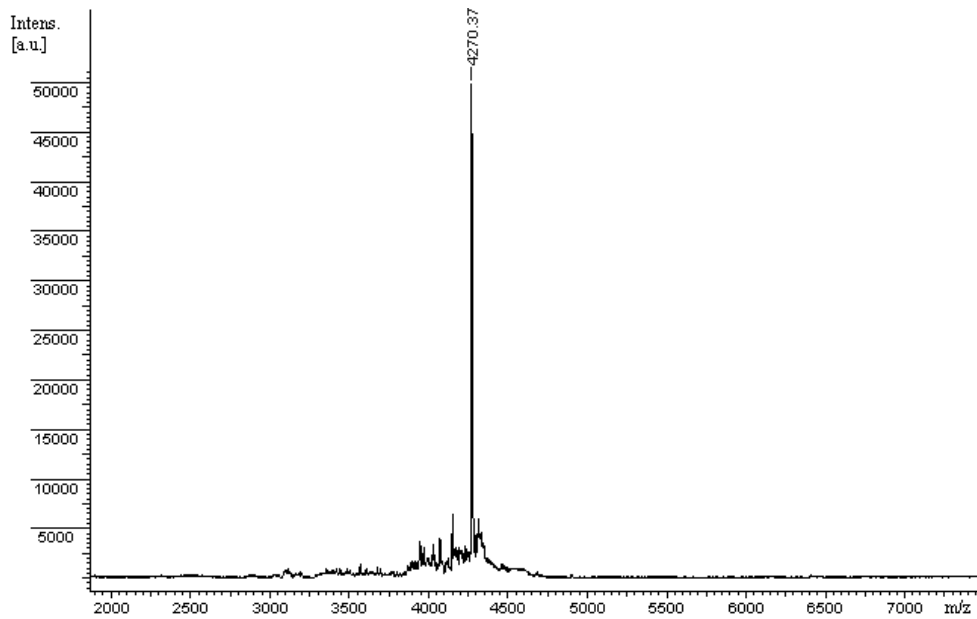

# 11D-E2

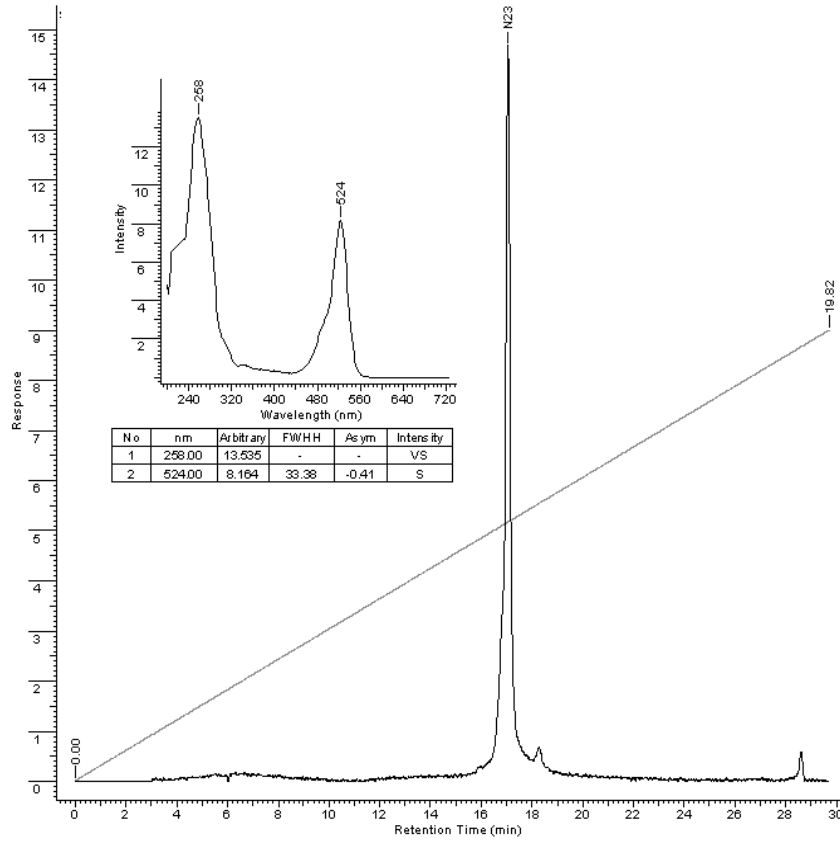

| Name | TR     | Peak Area (Y units) | Area Percent | Width | Asymmetry | Plate Number |
|------|--------|---------------------|--------------|-------|-----------|--------------|
| N23  | 17.063 | 239591.859          | 100.000      | 0.305 | 1.095     | 50088.266    |

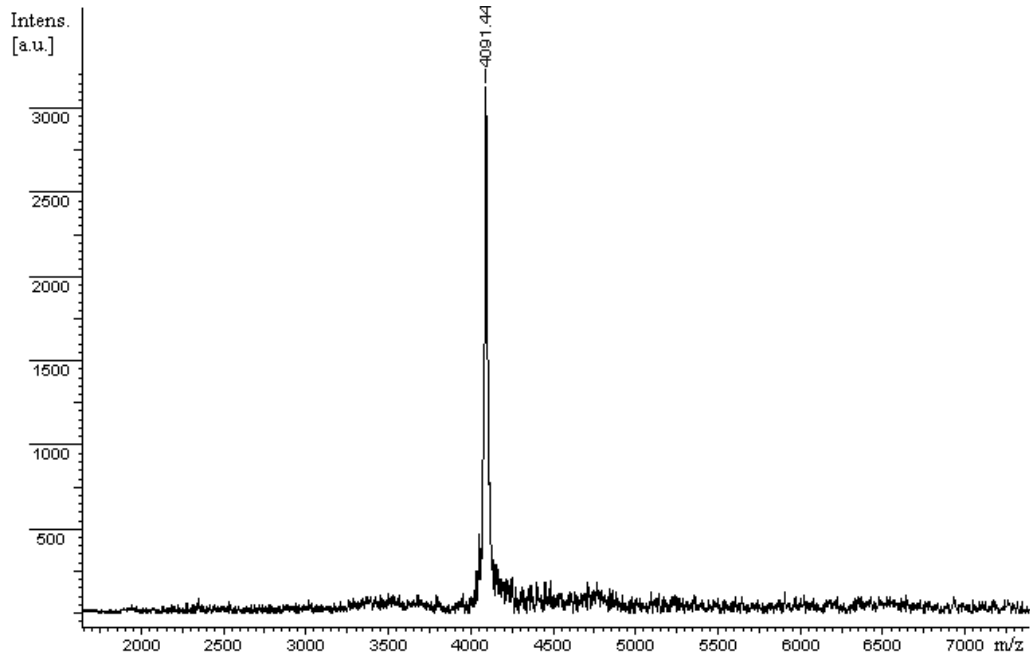

# 5'-FAM1-11D

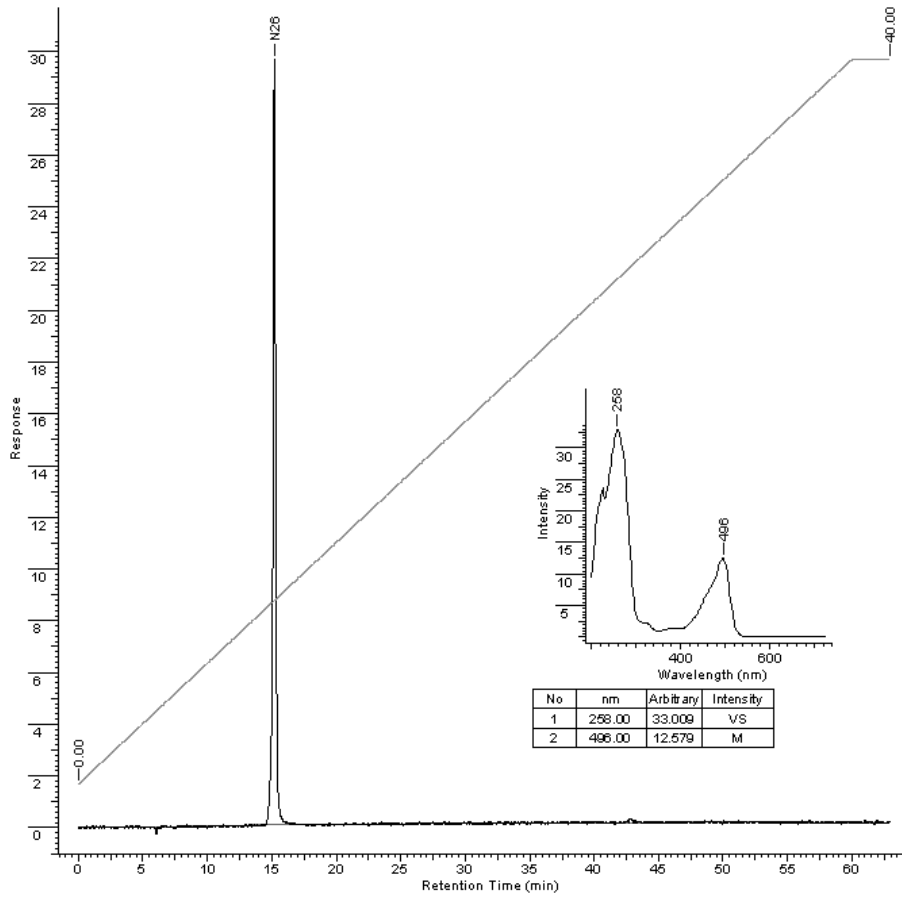

| Name | TR     | Peak Area (Y units/ms) | Area Percent | Width | Asymmetry | Plate Number |
|------|--------|------------------------|--------------|-------|-----------|--------------|
| N26  | 15.198 | 400013.188             | 100.000      | 0.279 | 1.000     | 47611.262    |

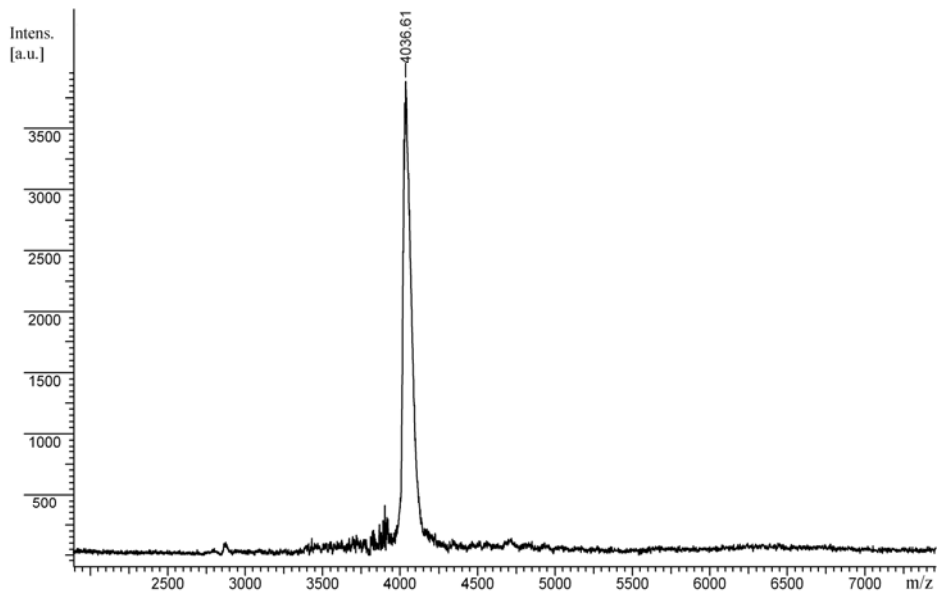

**5'-FAM2-11D**

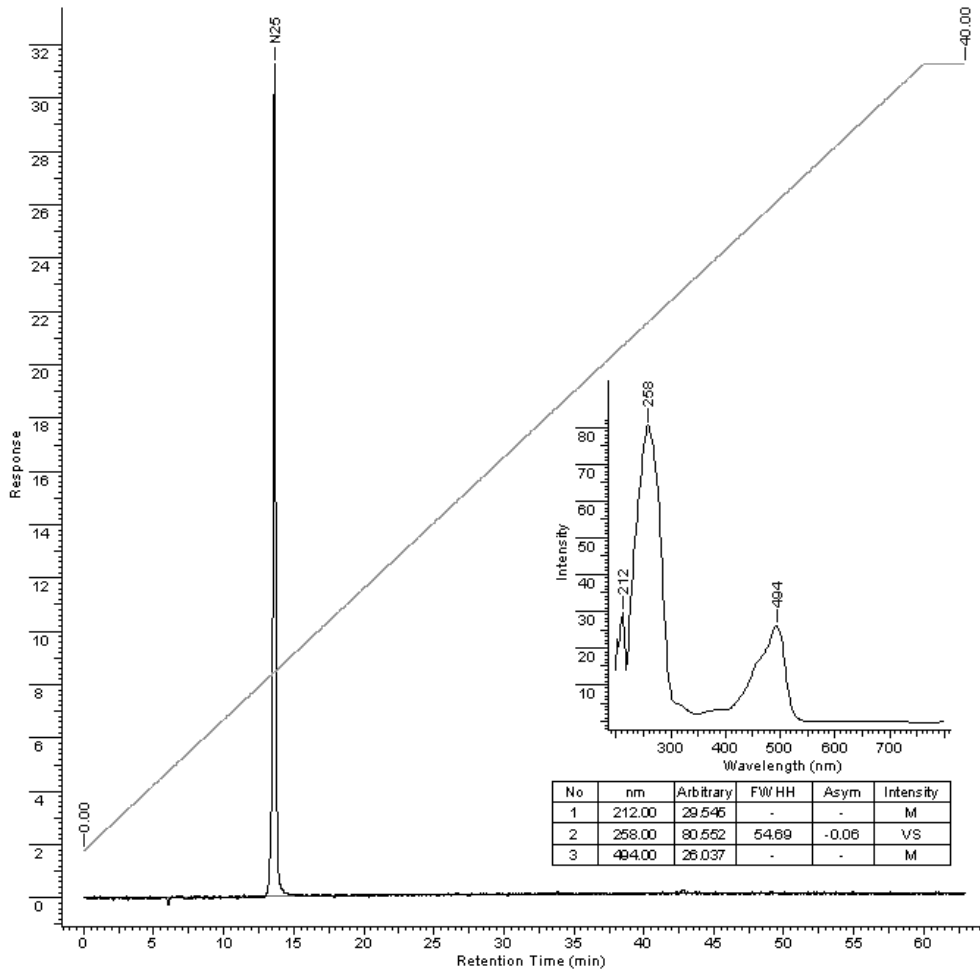

| Name | tR     | Peak Area (Y units/ms) | Area Percent | Width | Asymmetry | Plate Number |
|------|--------|------------------------|--------------|-------|-----------|--------------|
| N25  | 13.613 | 374074.500             | 100.000      | 0.249 | 0.923     | 47913.387    |

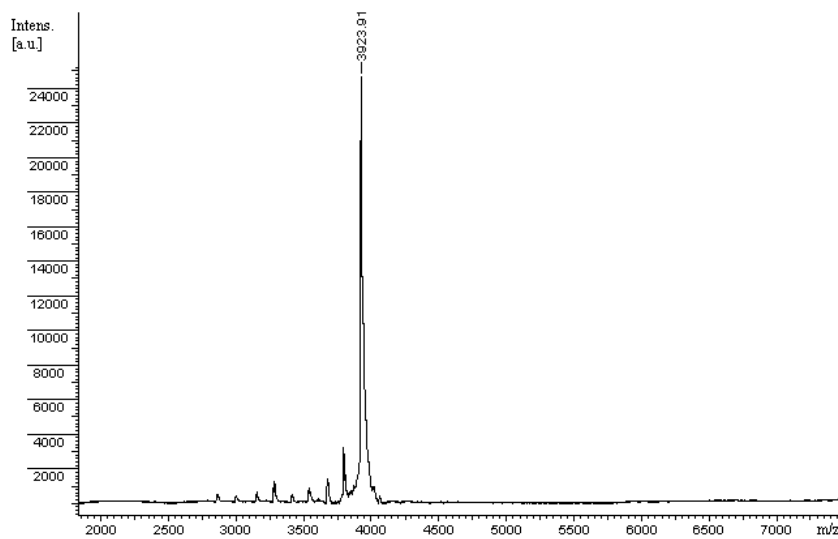

# 11D-FITC

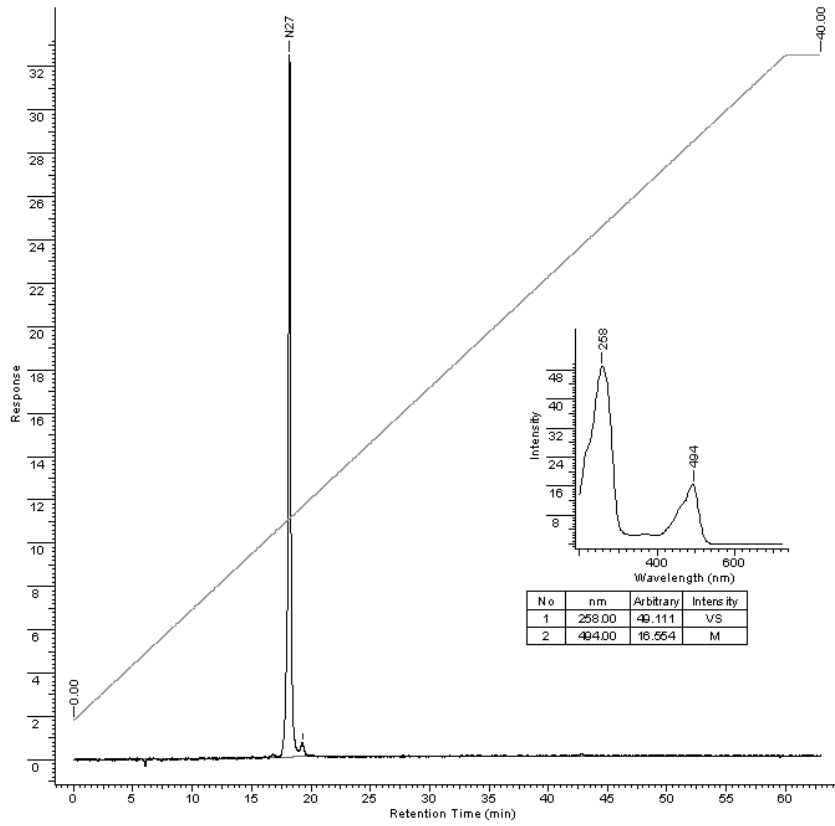

| Name    | TR     | Peak Area (Y units/ms) | Area Percent | Width | Asymmetry | Resolution | Plate Number |
|---------|--------|------------------------|--------------|-------|-----------|------------|--------------|
| N27     | 18.184 | 503382.969             | 97.323       | 0.308 | 1.067     | 2.632      | 55604.047    |
| unknown | 19.271 | 13844.640              | 2.677        | 0.517 | 0.733     | -          | 22194.207    |

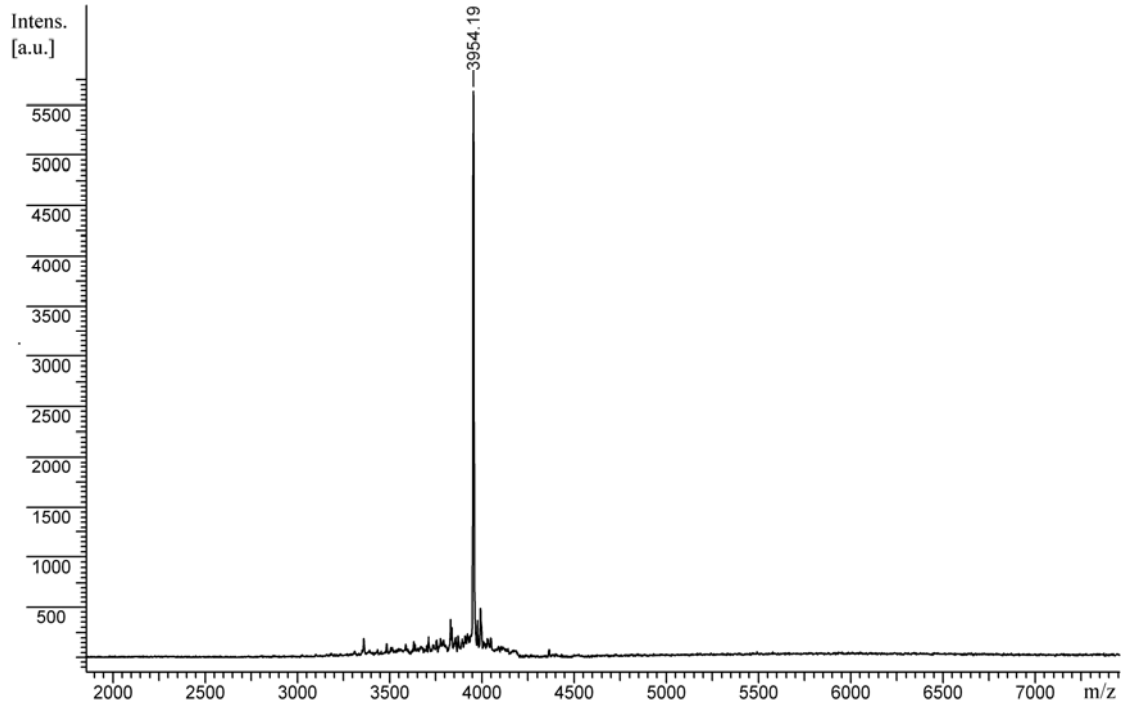



# HEX-11D

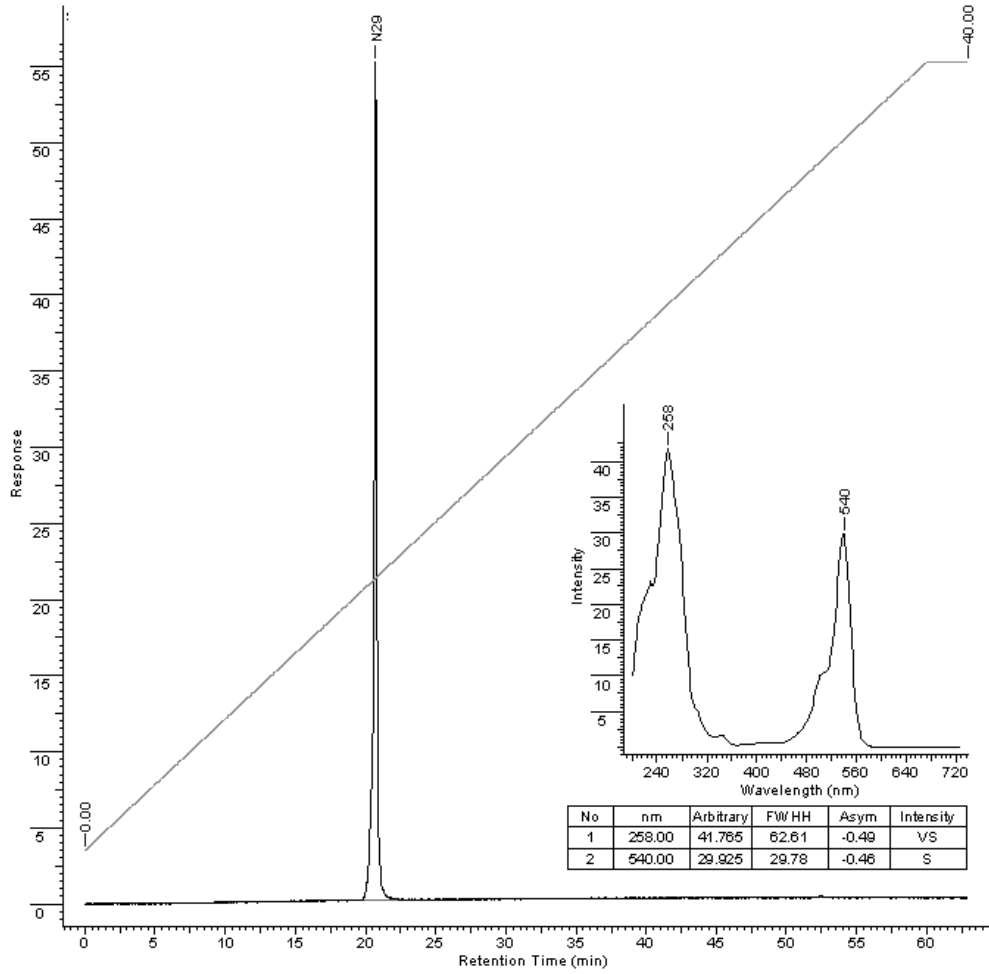

| Name | tR     | Peak Area (Y units/ms) | Area Percent | Width | Asymmetry | Plate Number |
|------|--------|------------------------|--------------|-------|-----------|--------------|
| N29  | 20.713 | 830642.188             | 100.000      | 0.299 | 0.875     | 77034.516    |

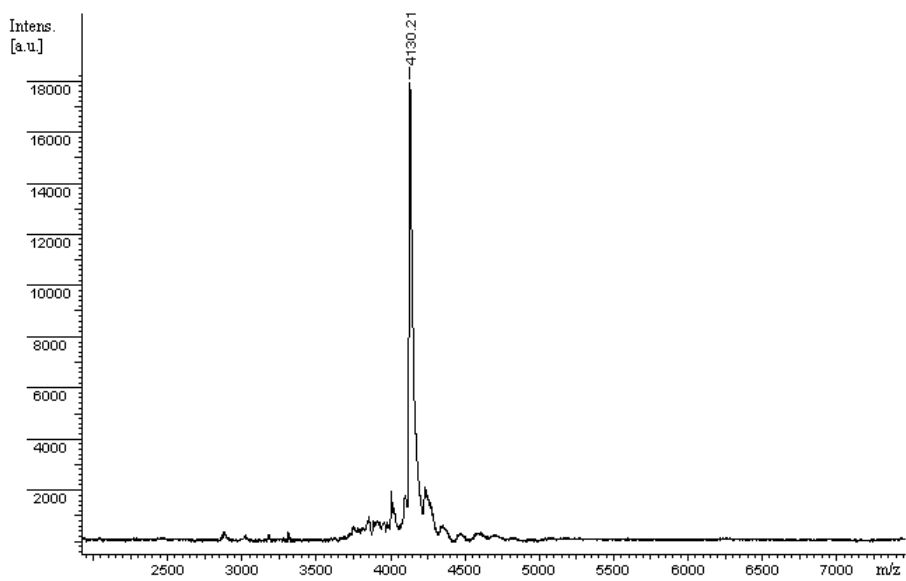

# HEX<sub>Acr</sub>-11D

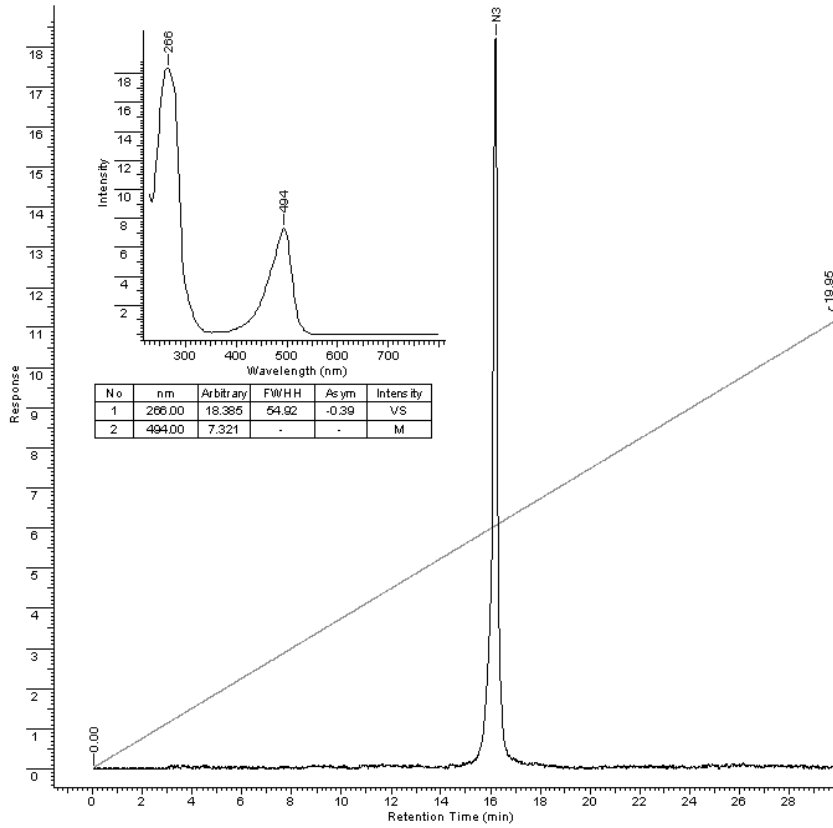

| Name | IR Peak | Area (Y units) | Area Percent | Width | Asymmetry | Plate Number |
|------|---------|----------------|--------------|-------|-----------|--------------|
| N3   | 16.198  | 272590.375     | 100.000      | 0.279 | 0.867     | 54066.191    |

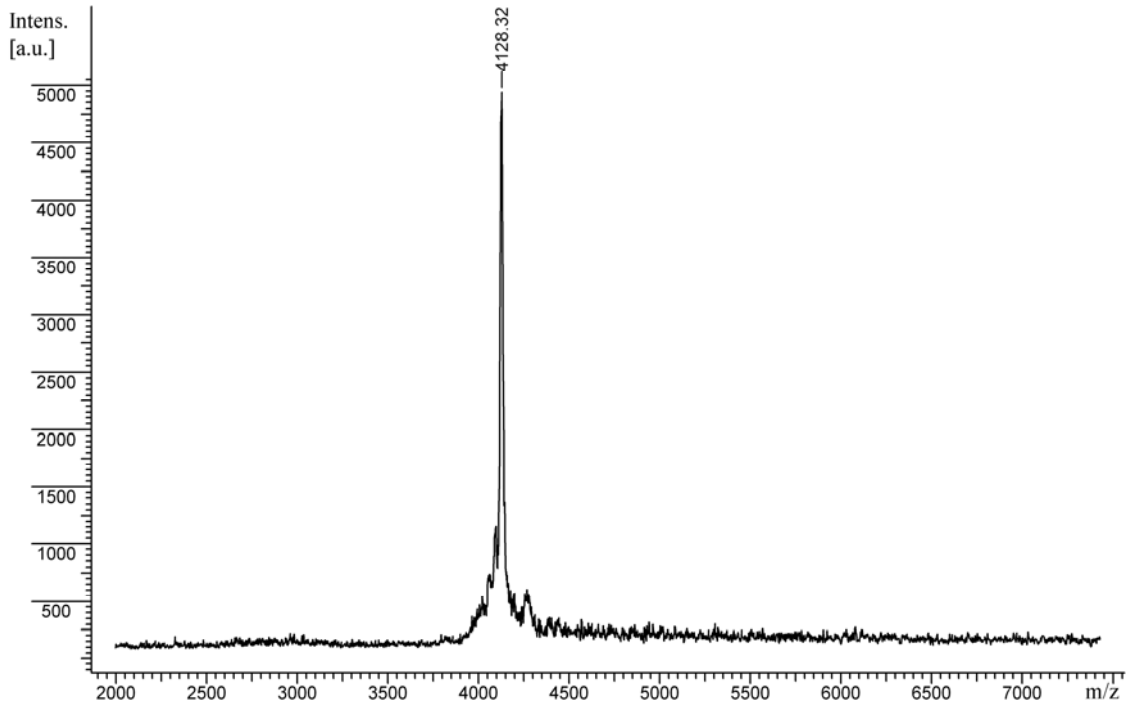

# TET-11D

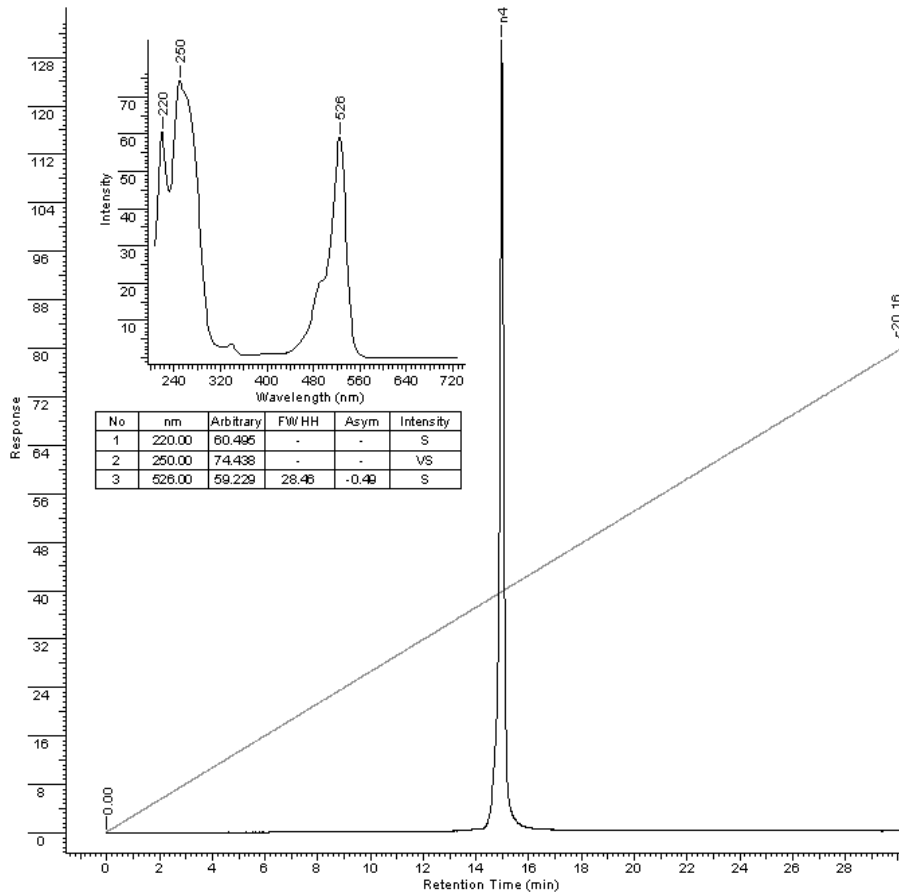

| Name | TR     | Peak | Area (Y units) | Area Percent | Width | Asymmetry | Plate Number |
|------|--------|------|----------------|--------------|-------|-----------|--------------|
| n4   | 14.975 |      | 1579941.500    | 100.000      | 0.260 | 1.066     | 53220.902    |

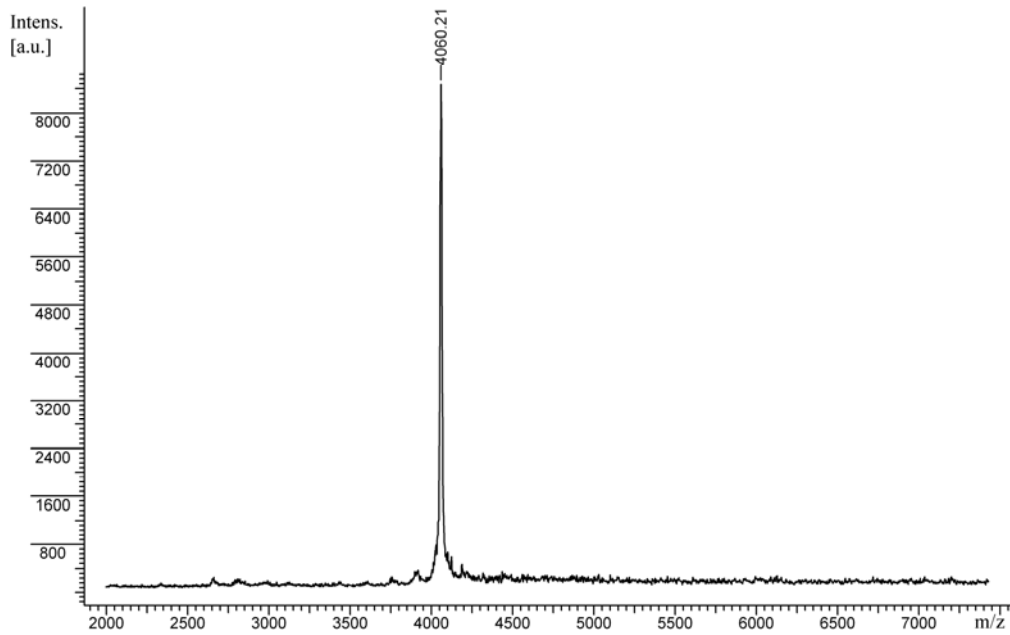

JOE-11D

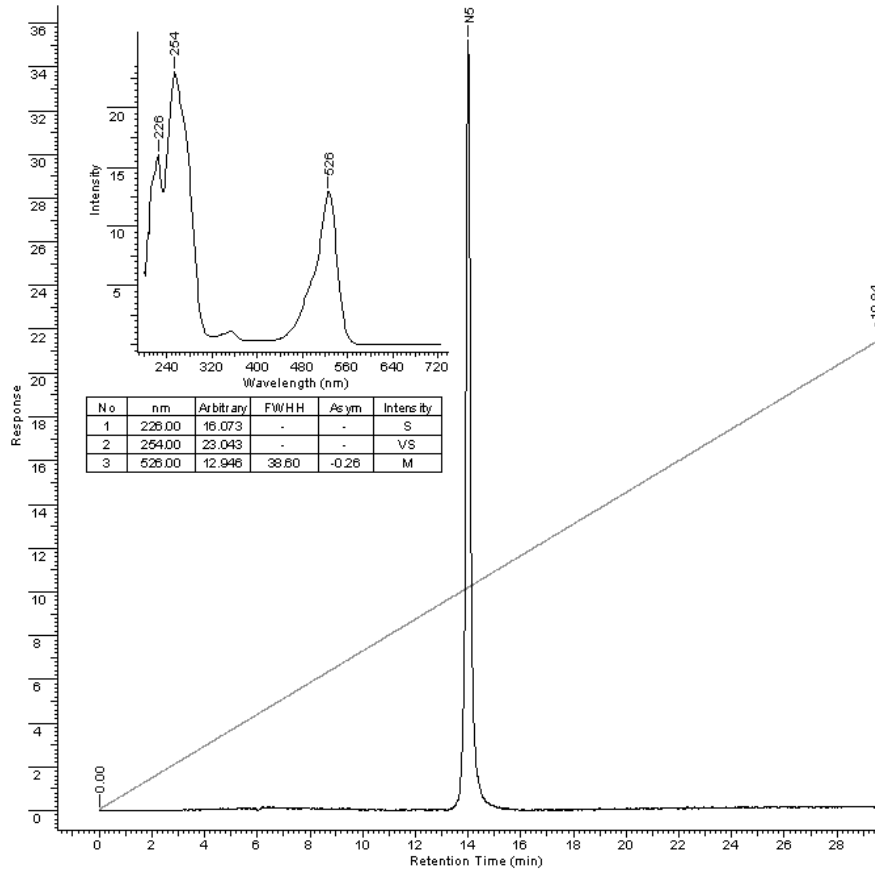

| Name | TR Peak | Area (Y units) | Area Percent | Width | Asymmetry | Plate Number |
|------|---------|----------------|--------------|-------|-----------|--------------|
| N5   | 14.009  | 455089.594     | 100.000      | 0.291 | 0.952     | 37183.137    |

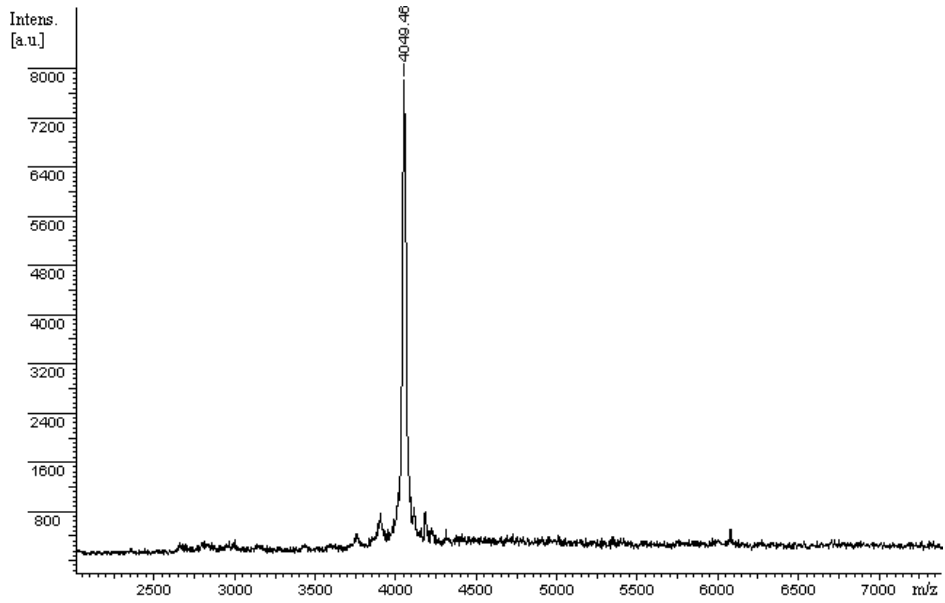

### 11D-Ole

Double peak on HPLC is a result of the presence of the stereocenter in glycerol moiety (Figure 1). Mass spectrum is recorded for a mixture of peaks.

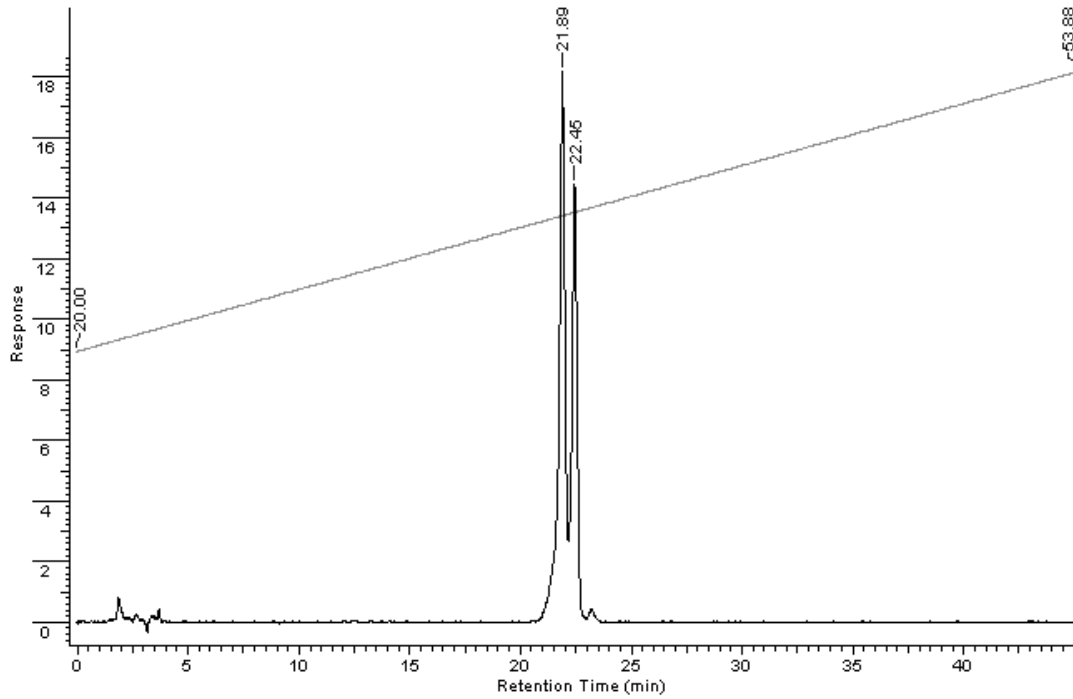

| Name    | tR     | Peak Area (Y units/ms) | Area Percent | Width | Asymmetry | Resolution | Plate Number |
|---------|--------|------------------------|--------------|-------|-----------|------------|--------------|
| N6      | 21.894 | 344811.125             | 56.923       | 0.388 | 0.950     | 1.463      | 50929.844    |
| unknown | 22.447 | 236705.625             | 39.076       | 0.368 | 0.947     | 1.896      | 59481.328    |

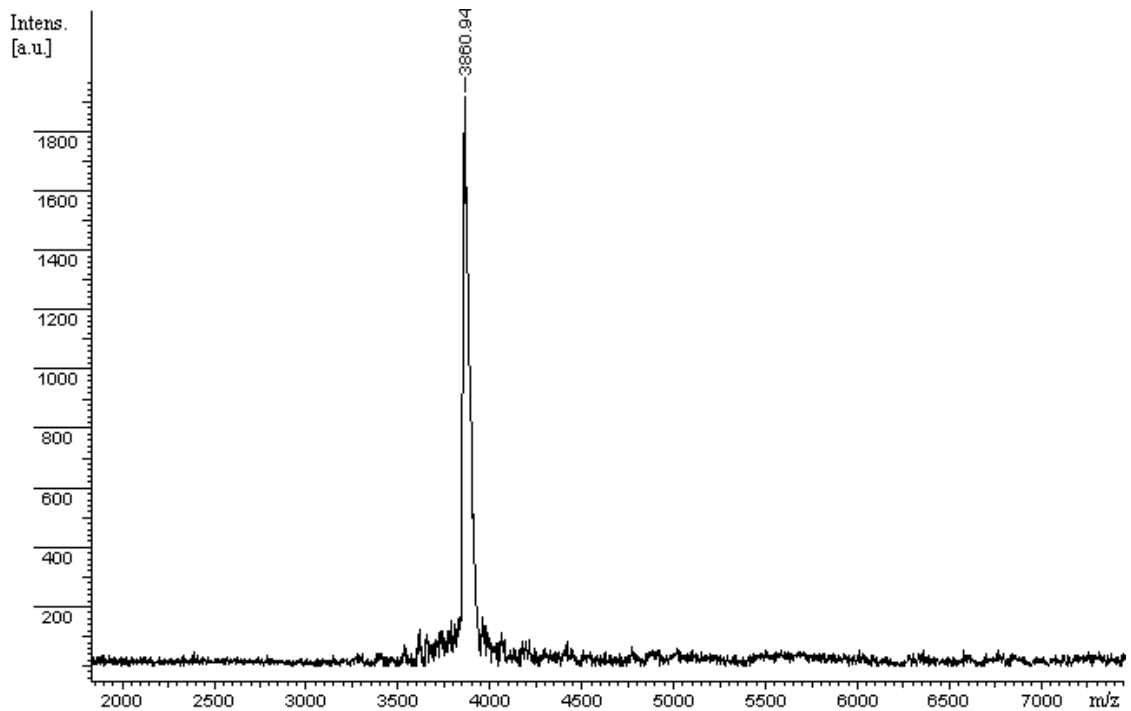

### FAM-11D-Ole

Double peak on HPLC is a result of the presence of the stereocenter in glycerol moiety (Figure 1). Mass spectrum is recorded for a mixture of peaks.

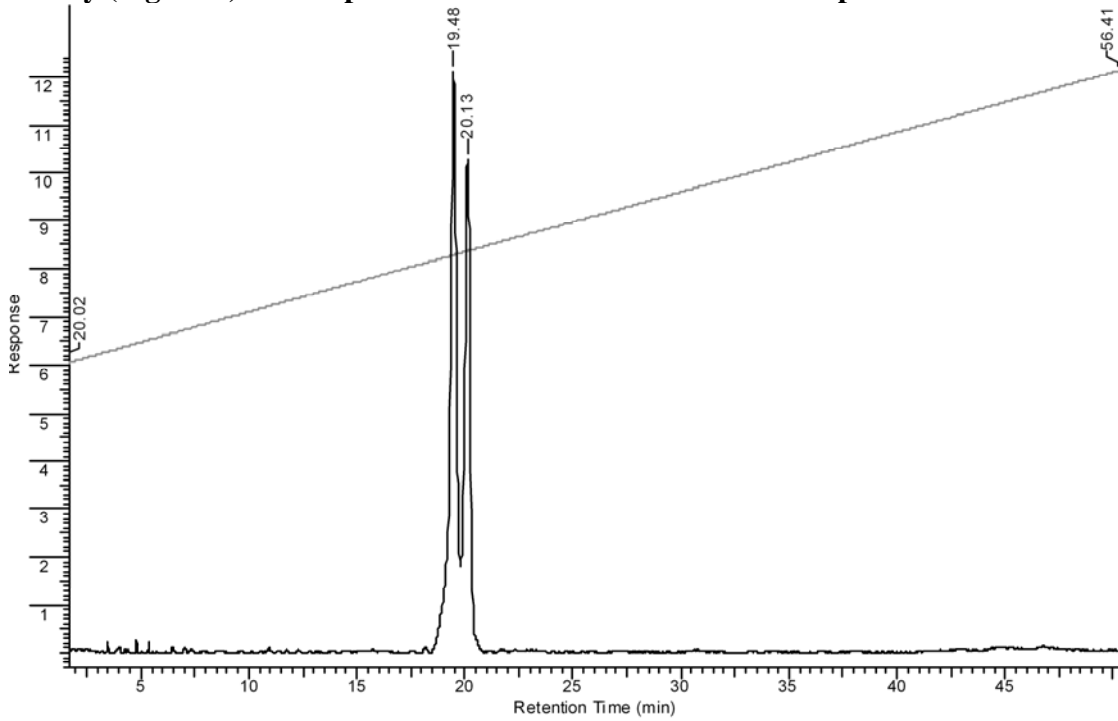

| Name    | tR     | Peak Area (Y units/ms) | Area Percent | Width | Assymetry | Resolution | Plate Number |
|---------|--------|------------------------|--------------|-------|-----------|------------|--------------|
| N7      | 19.480 | 298653.354             | 54.870       | 0.435 | 0.952     | 1.357      | 39799.359    |
| unknown | 20.139 | 215639.571             | 39.618       | 0.424 | 0.818     | -          | 44090.024    |

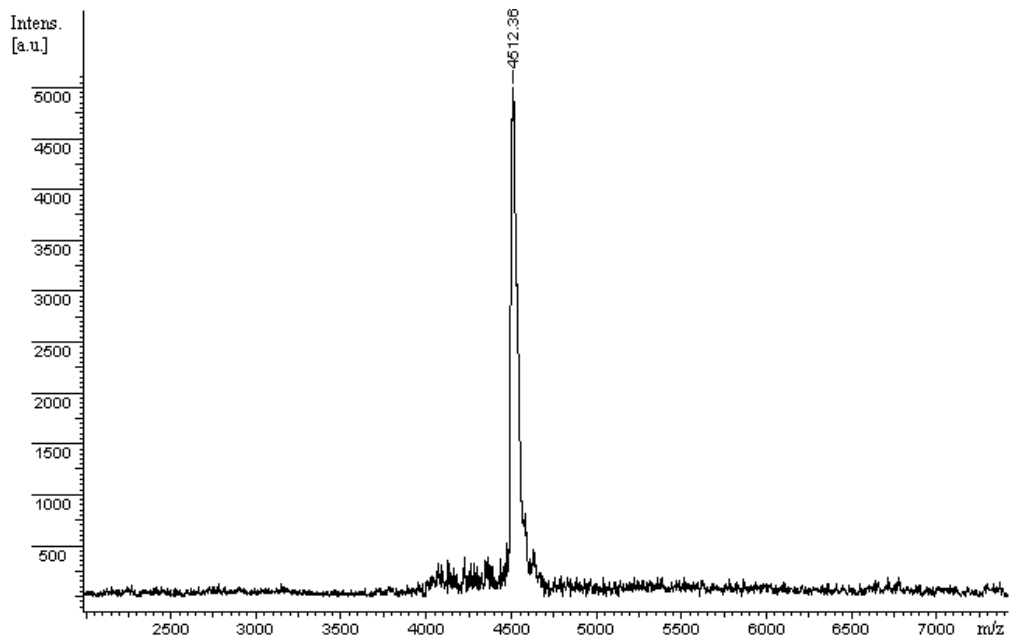

### 11D-FAM-Ole

Double peak on HPLC is a result of the presence of the stereocenter in glycerol moiety (Figure 1). Mass spectrum is recorded for a mixture of peaks.

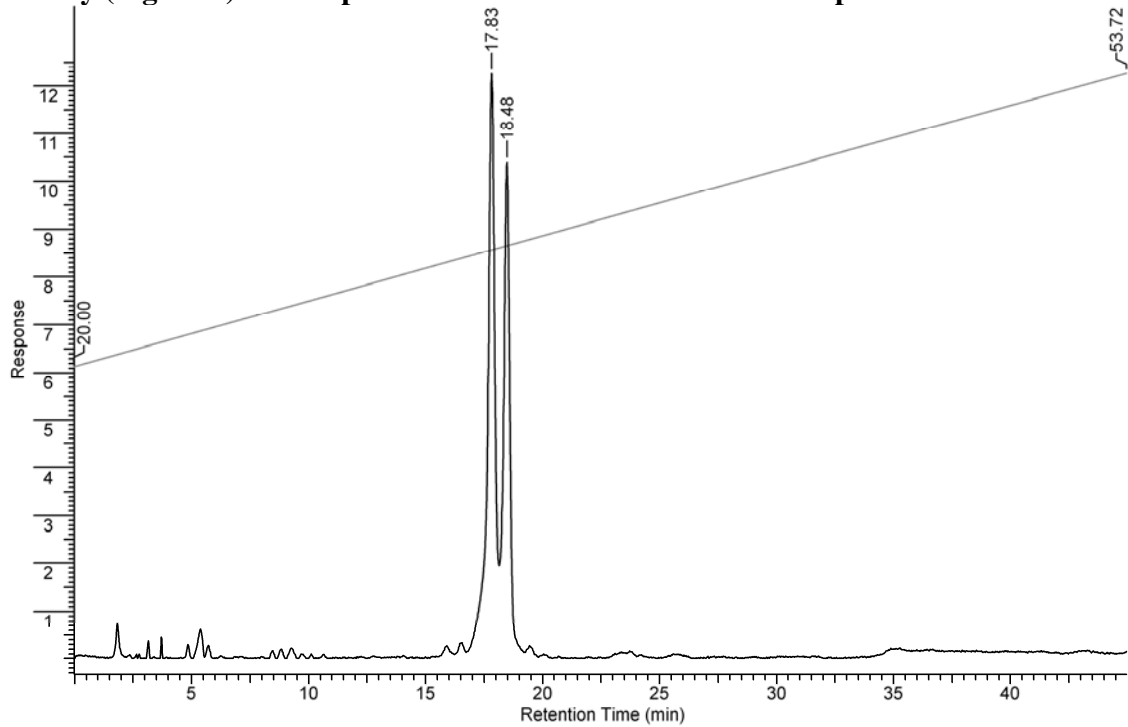

| Name    | tR     | Peak Area (Y units/ms) | Area Percent | Width | Asymmetry | Resolution | Plate Number |
|---------|--------|------------------------|--------------|-------|-----------|------------|--------------|
| N8      | 17.828 | 255549.922             | 45.452       | 0.428 | 0.955     | 1.545      | 27778.529    |
| unknown | 18.481 | 184714.344             | 32.853       | 0.418 | 0.909     | -          | 31289.764    |

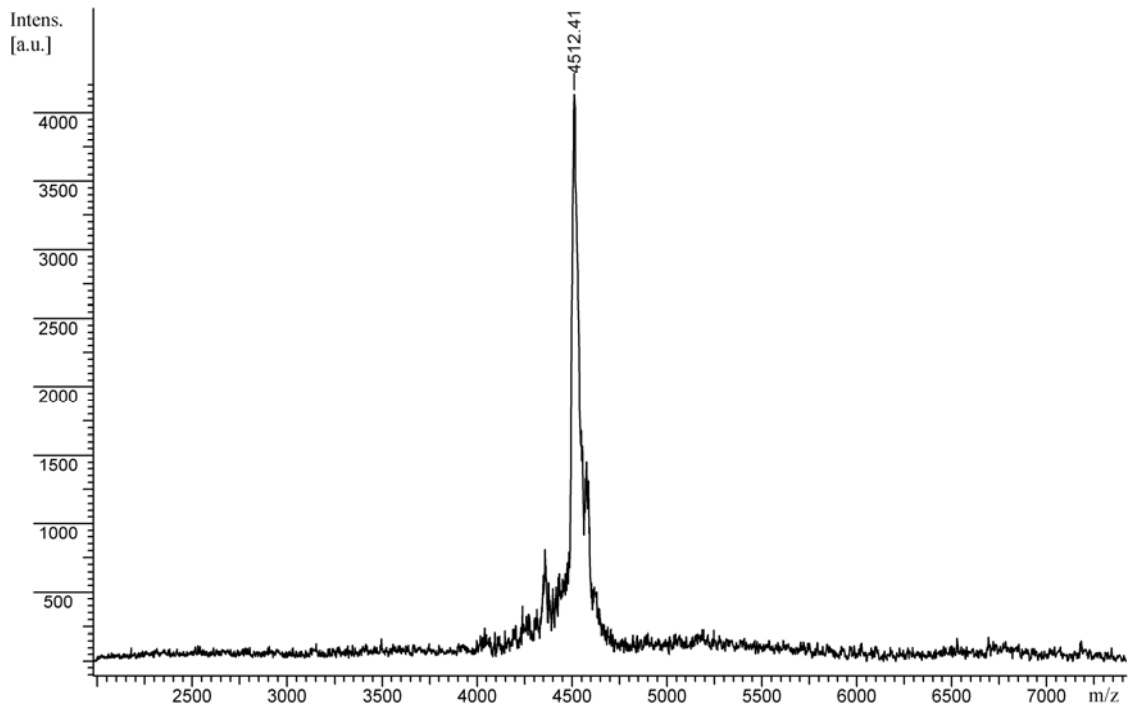

# 11DX-E-1

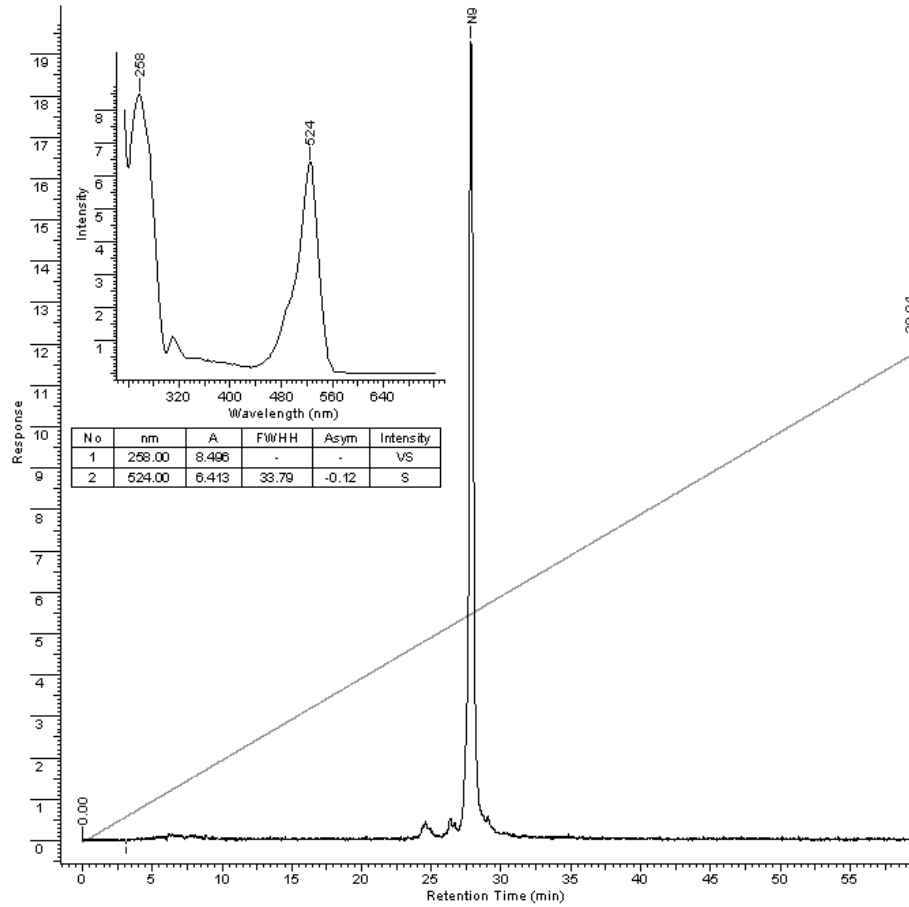

| Name | IR Peak | Area (Y units) | Area Percent | Width | Asymmetry | Plate Number |
|------|---------|----------------|--------------|-------|-----------|--------------|
| N9   | 27.842  | 450180.688     | 100.000      | 0.517 | 1.166     | 46373.379    |

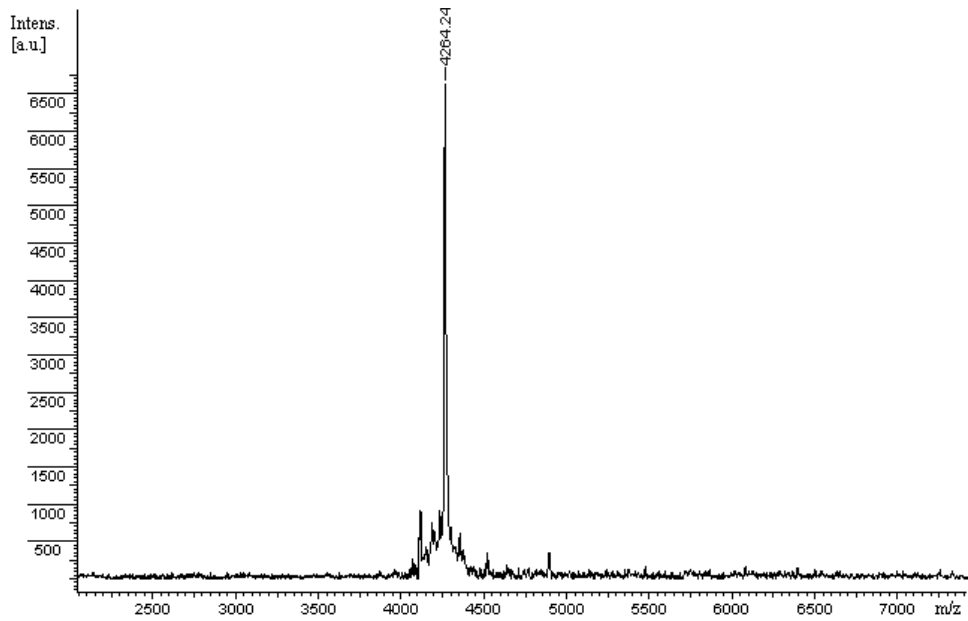



# 11DX-E-2

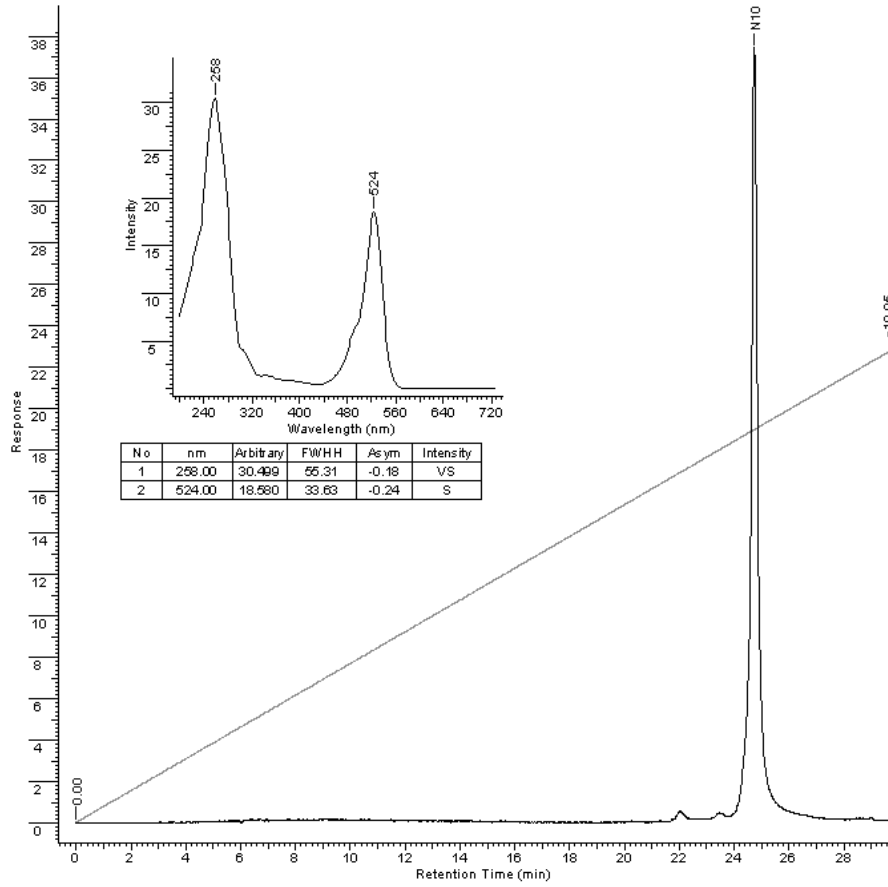

| Name | IR Peak | Area (Y units) | Area Percent | Width | Asymmetry | Plate Number |
|------|---------|----------------|--------------|-------|-----------|--------------|
| N10  | 24.739  | 675369.750     | 100.000      | 0.366 | 1.020     | 73193.102    |

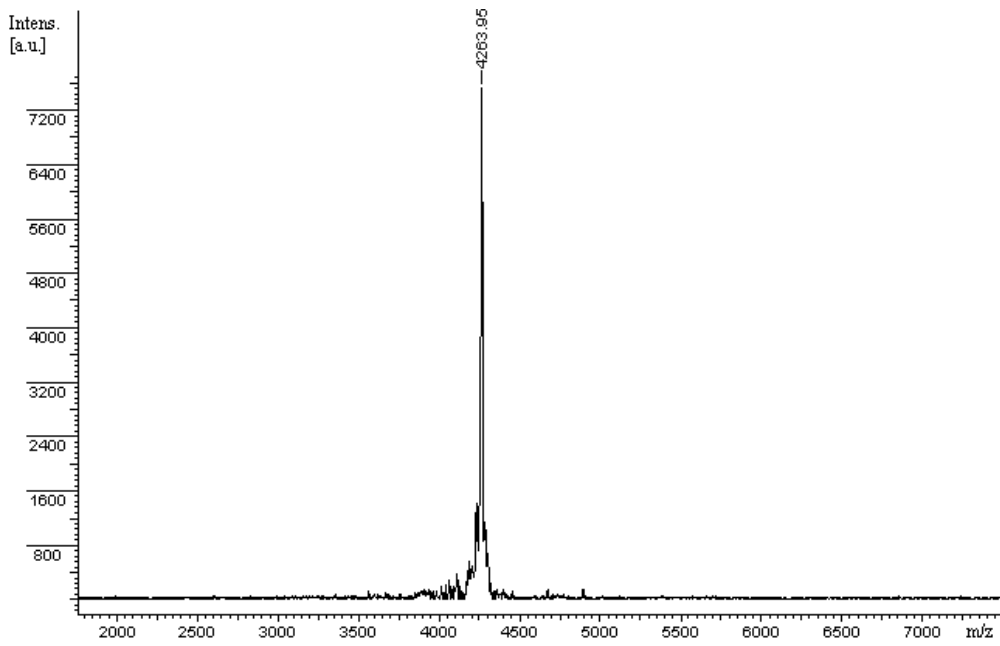

# 11DX-E-3

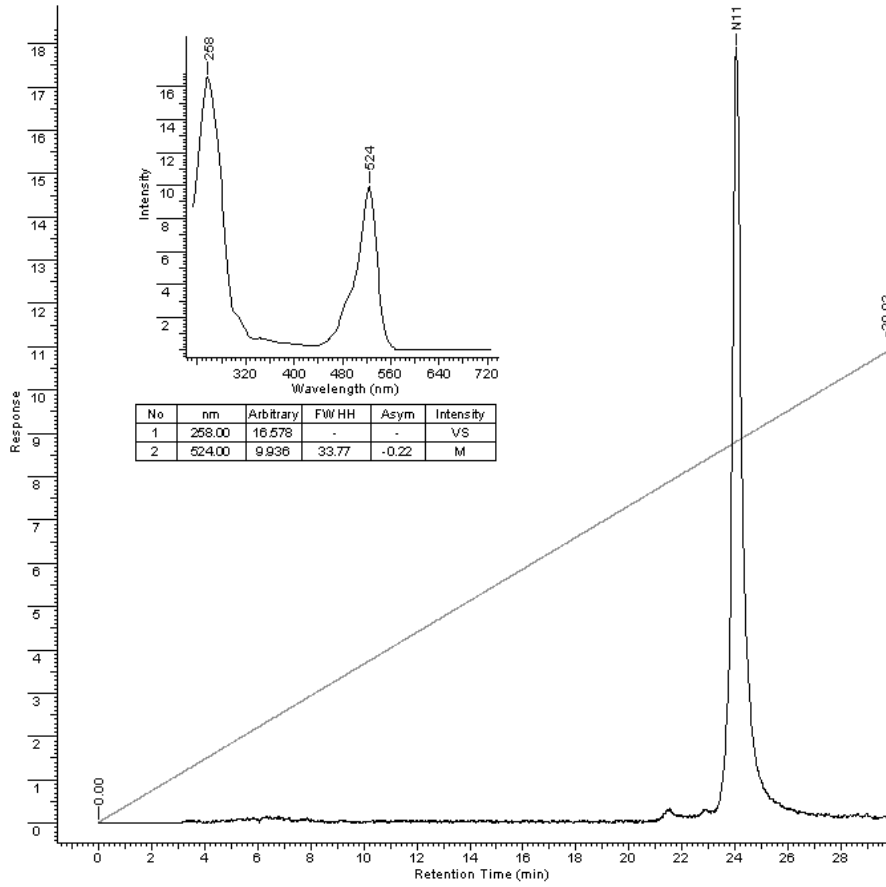

| Name | IR Peak | Area (Y units) | Area Percent | Width | Asymmetry | Plate Number |
|------|---------|----------------|--------------|-------|-----------|--------------|
| N11  | 24.063  | 516031.781     | 100.000      | 0.584 | 1.110     | 27199.270    |

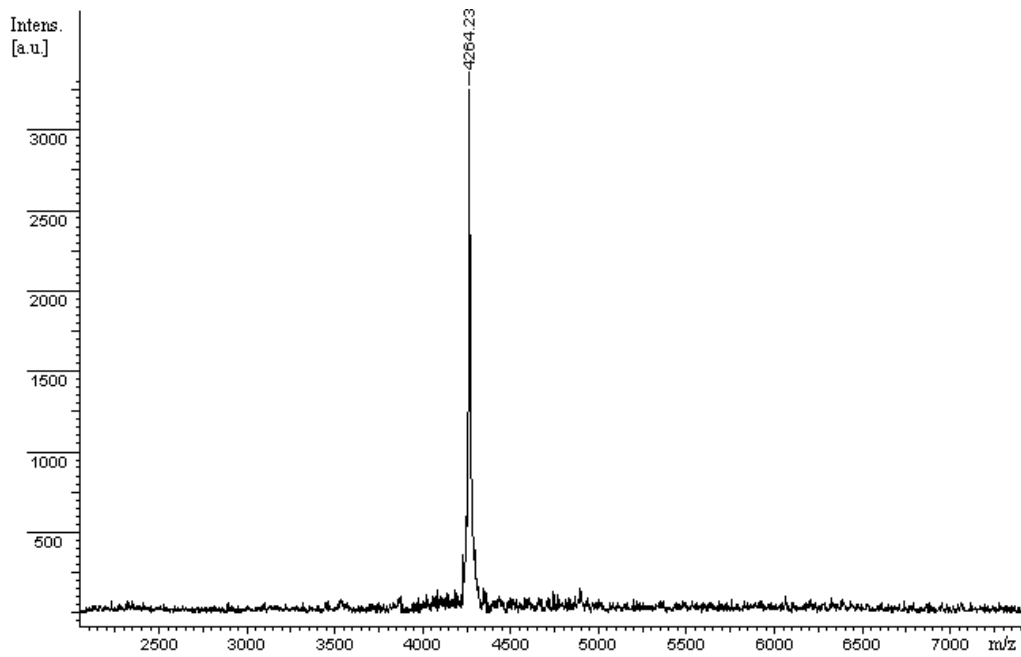

# 11DS-E-1

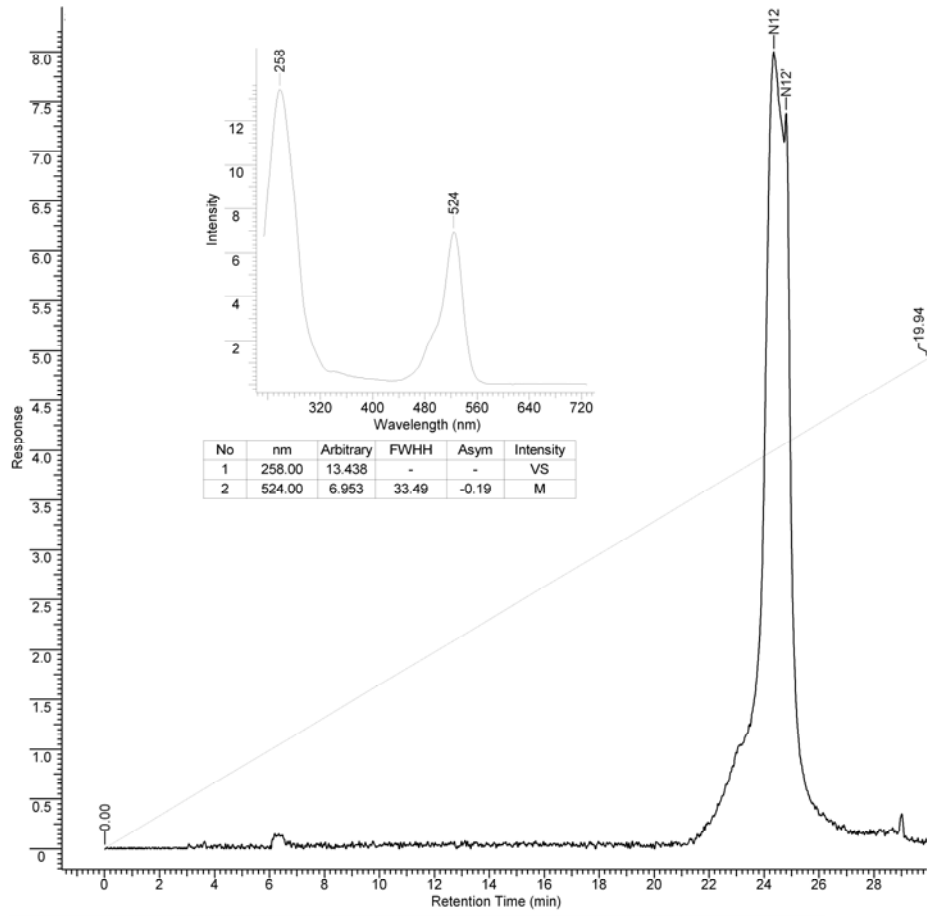

| Name | tR     | Peak Area (Y units) | Area Percent | Width | Asymmetry | Resolution | Plate Number |
|------|--------|---------------------|--------------|-------|-----------|------------|--------------|
| N12  | 24.357 | 411262.563          | 74.932       | 1.035 | 1.000     | 0.567      | 8863.962     |
| N12' | 24.797 | 137583.938          | 25.068       | 0.517 | 1.000     | -          | 36748.016    |

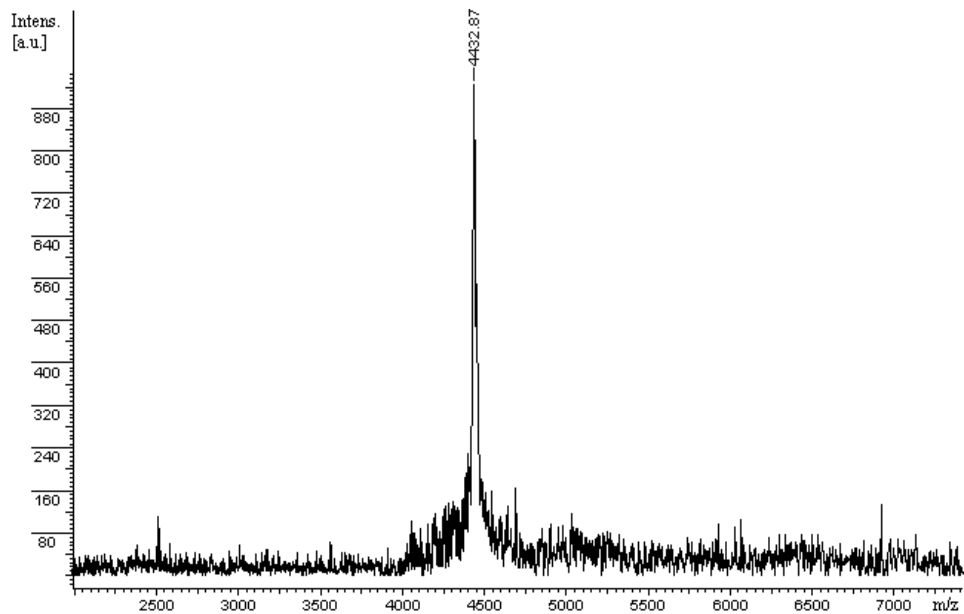

# 11DS-E-2

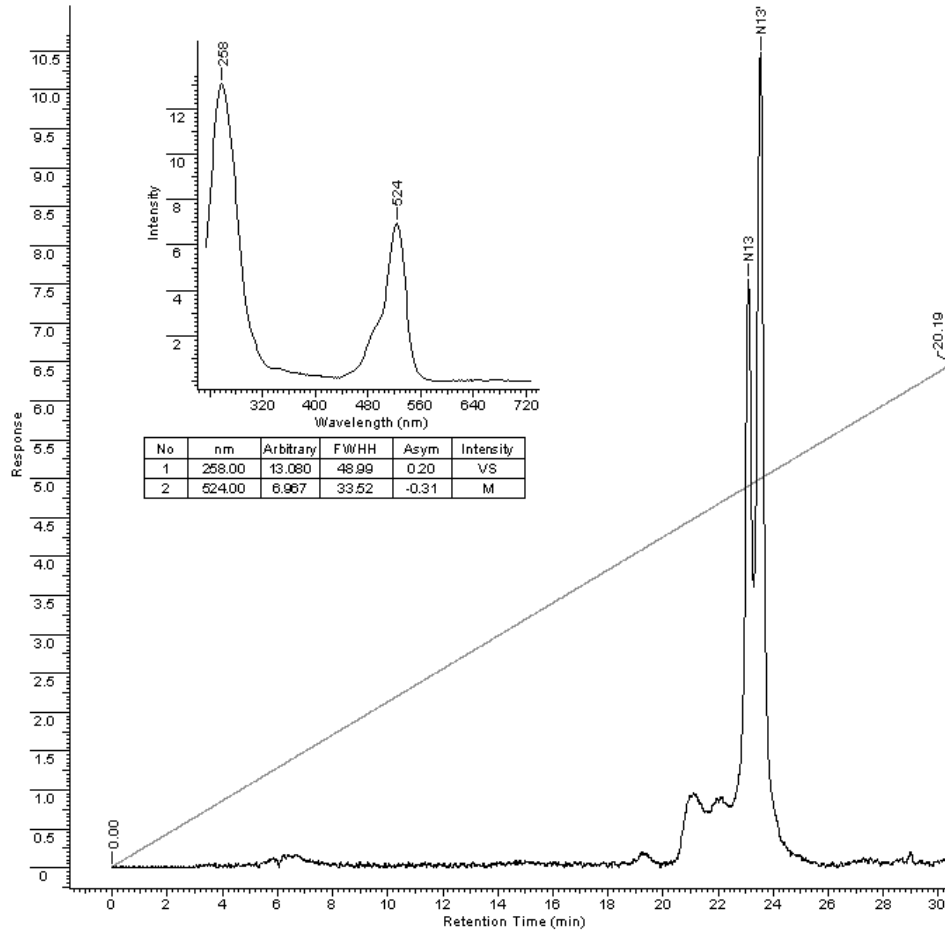

| Name | tR Peak | Area (Y units) | Area Percent | Width | Asymmetry | Resolution | Plate Number |
|------|---------|----------------|--------------|-------|-----------|------------|--------------|
| N13  | 23.103  | 149400.844     | 41.727       | 0.430 | 1.094     | 0.978      | 46187.863    |
| N13  | 23.536  | 207242.899     | 58.273       | 0.466 | 0.891     | -          | 42667.832    |

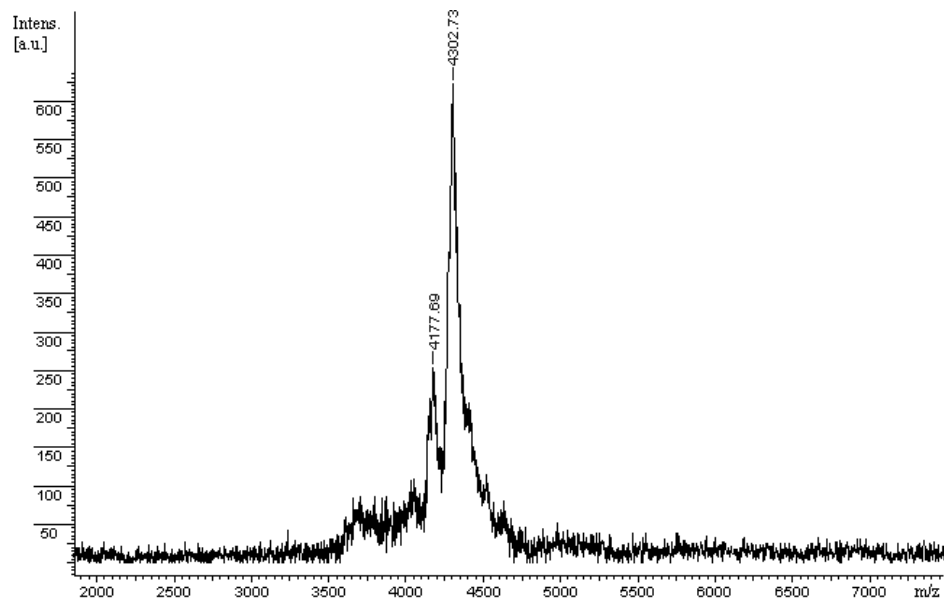

# 11DS-E-3

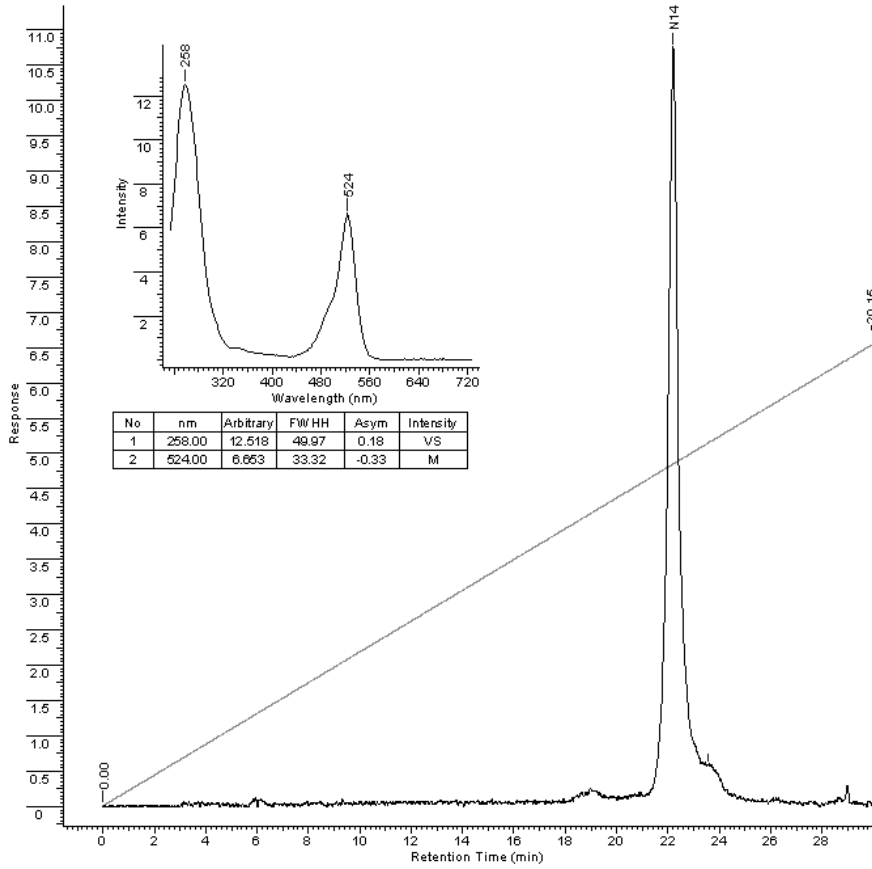

| Name    | tR     | Peak       | Area (Y units) | Area Percent | Width | Asymmetry | Resolution | Plate Number |
|---------|--------|------------|----------------|--------------|-------|-----------|------------|--------------|
| N14     | 22.200 | 346420.156 | 94.443         | 0.607        | 0.968 | 1.216     | 21404.902  |              |
| unknown | 23.574 | 20323.539  | 5.557          | 1.652        | 1.000 | -         | 3299.045   |              |

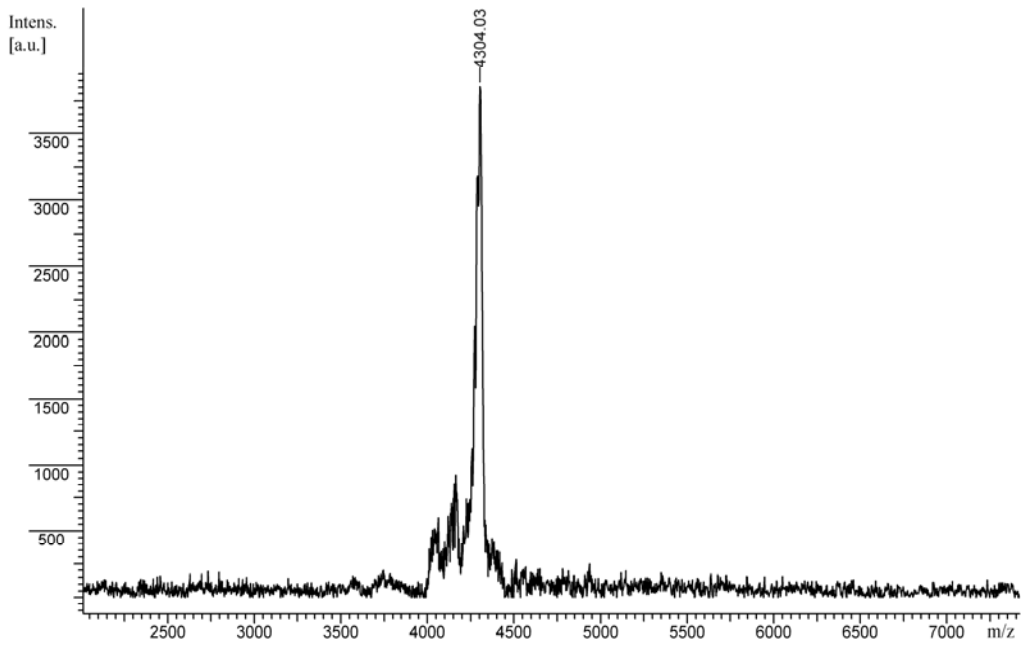

# 11DS-E-4

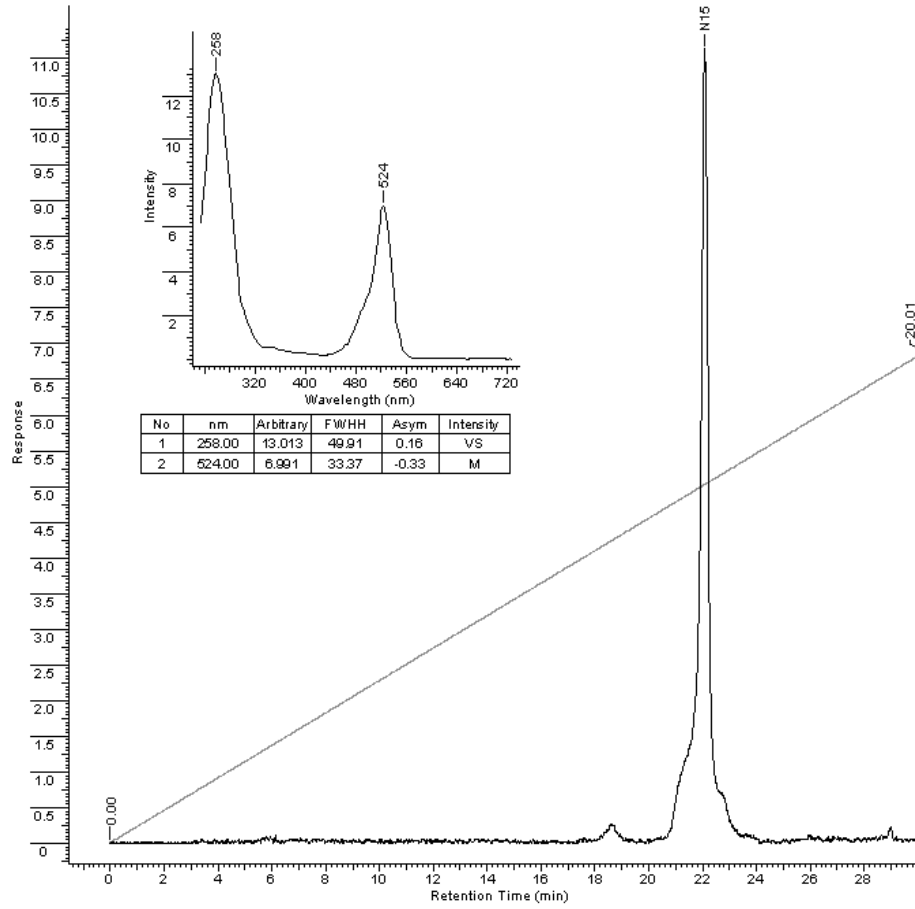

| Name | IR Peak | Area (Y units) | Area Percent | Width | Asymmetry | Plate Number |
|------|---------|----------------|--------------|-------|-----------|--------------|
| N15  | 22.085  | 255721.203     | 100.000      | 0.418 | 0.909     | 44682.055    |

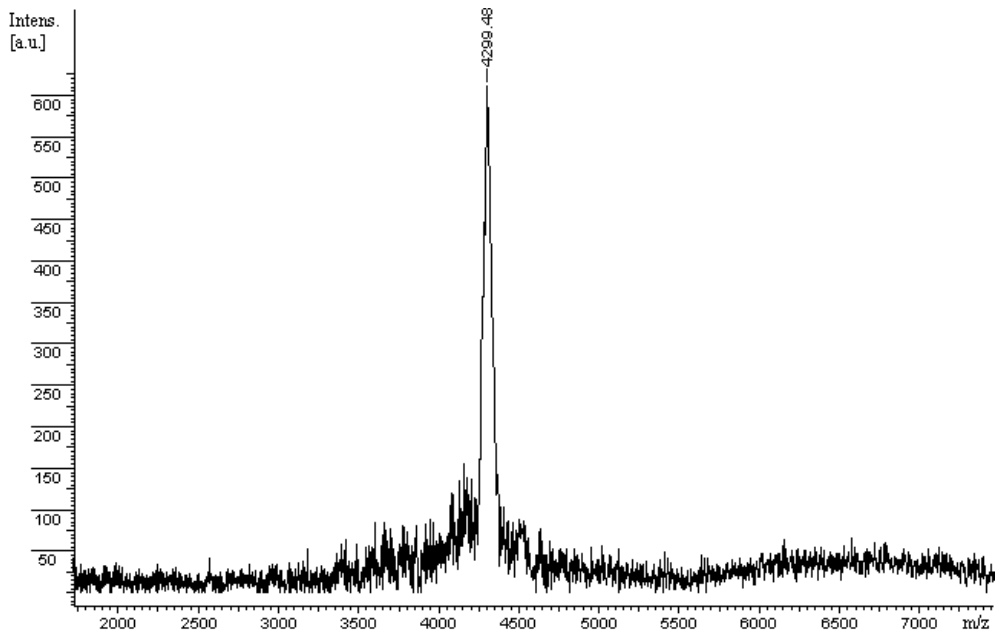

# HEX-11D-ddR

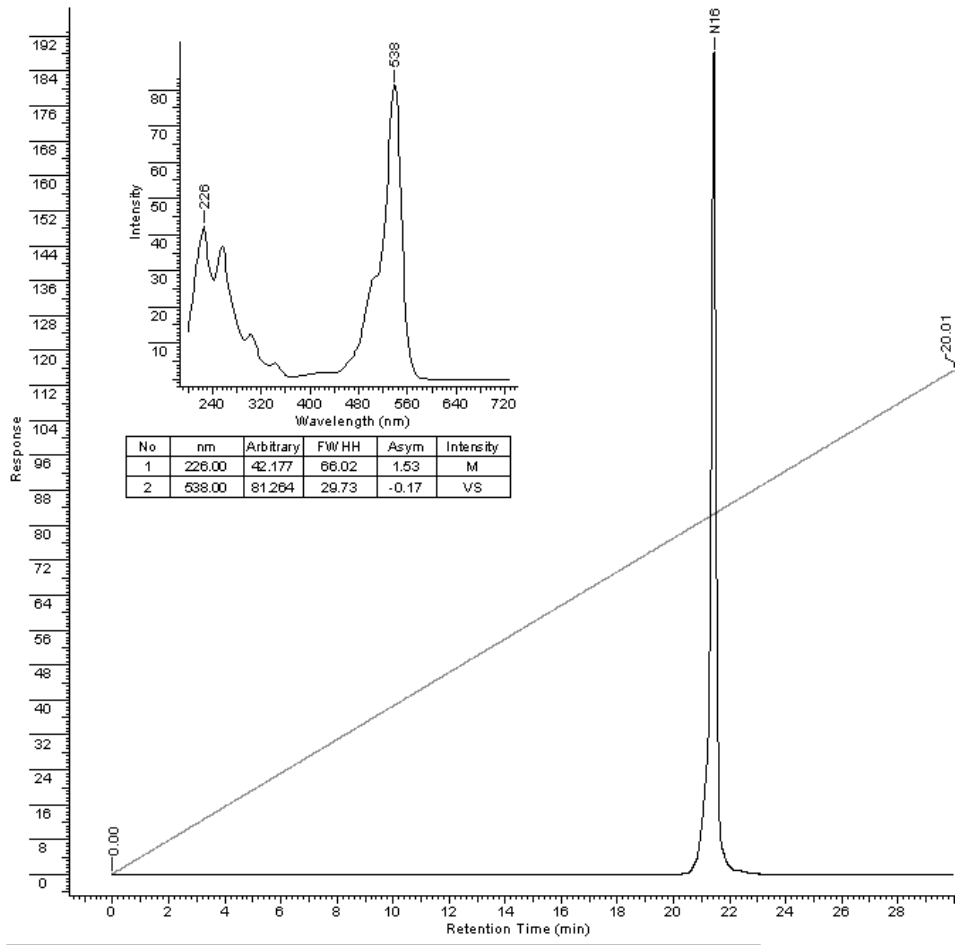

| Name | tR     | Peak | Area (Y units) | Area Percent | Width | Asymmetry | Plate Number |
|------|--------|------|----------------|--------------|-------|-----------|--------------|
| N16  | 21.437 |      | 2627330.250    | 100.000      | 0.309 | 0.946     | 77207.094    |

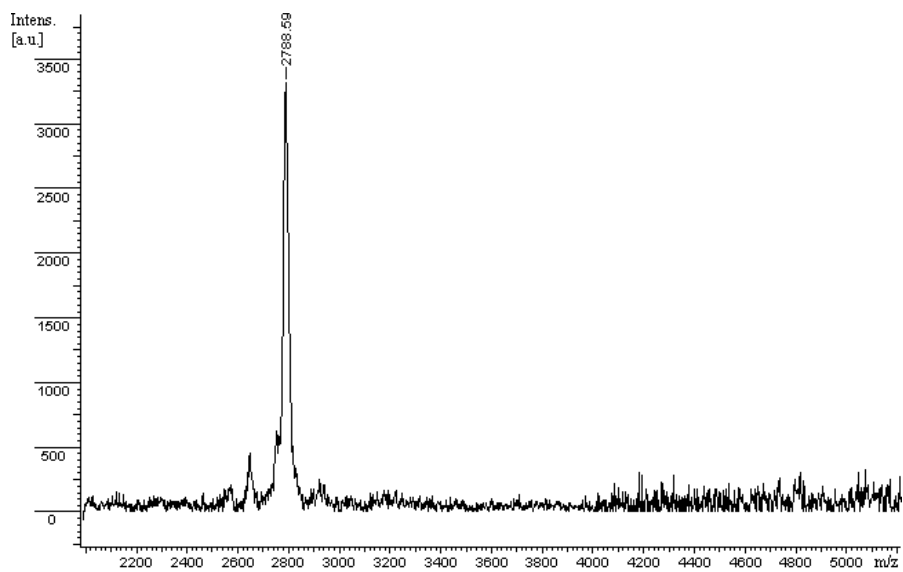

# HEX-11D-ddR1

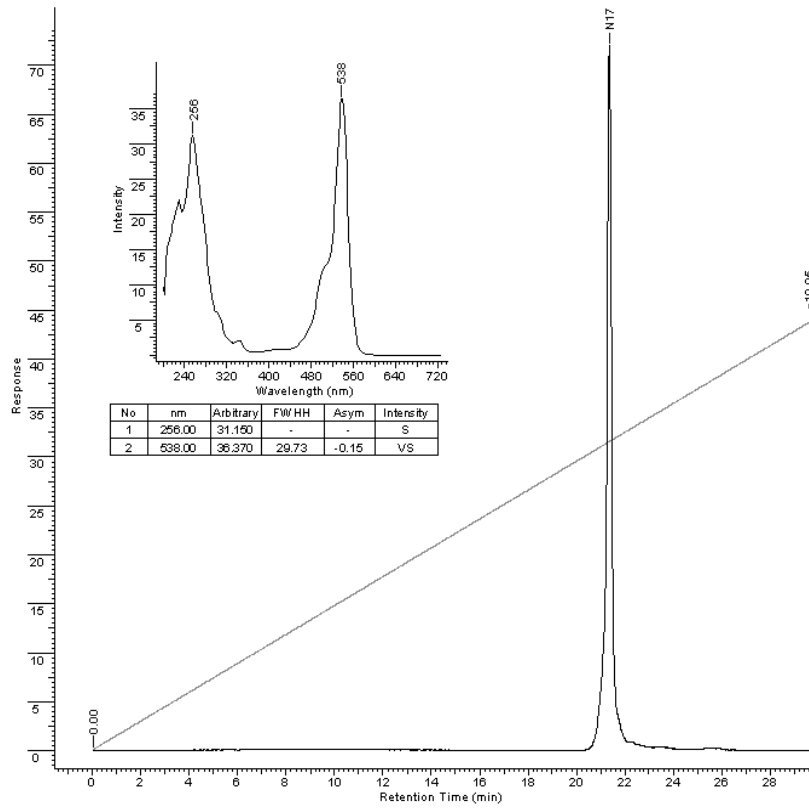

| Name | IR     | Peak   | Area (Y units) | Area Percent | Width | Asymmetry | Plate Number |
|------|--------|--------|----------------|--------------|-------|-----------|--------------|
| N17  | 21.359 | 107585 | 1.125          | 100.000      | 0.316 | 1.080     | 72872.289    |

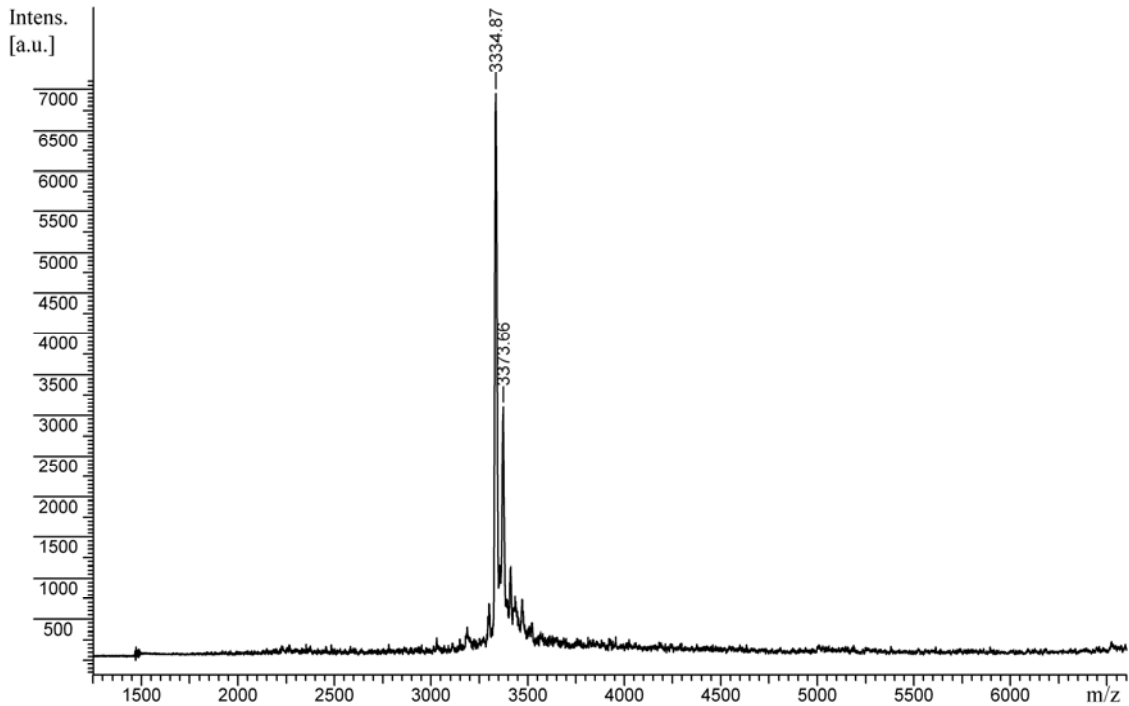



# HEX-11D-ddR2

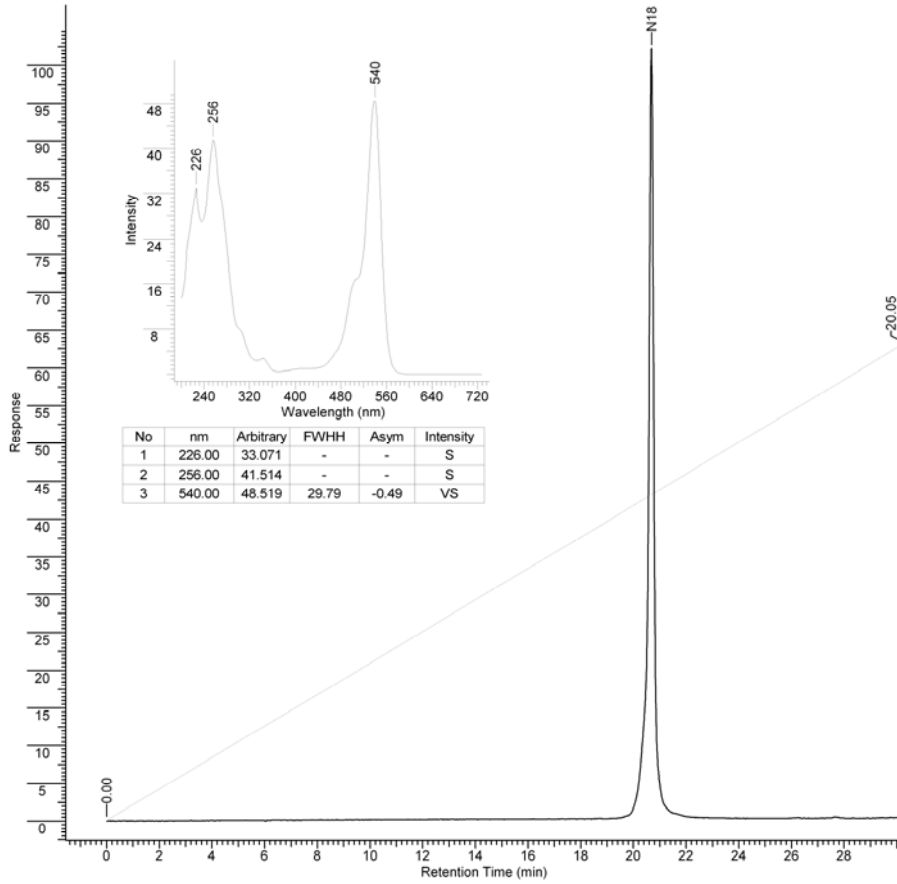

| Name | IR     | Peak Area (Y units) | Area Percent | Width  | Asymmetry | Plate Number |
|------|--------|---------------------|--------------|--------|-----------|--------------|
| N18  | 20.686 | 1517555.250         | 100.000      | 29.944 | 180.374   | 7.636        |

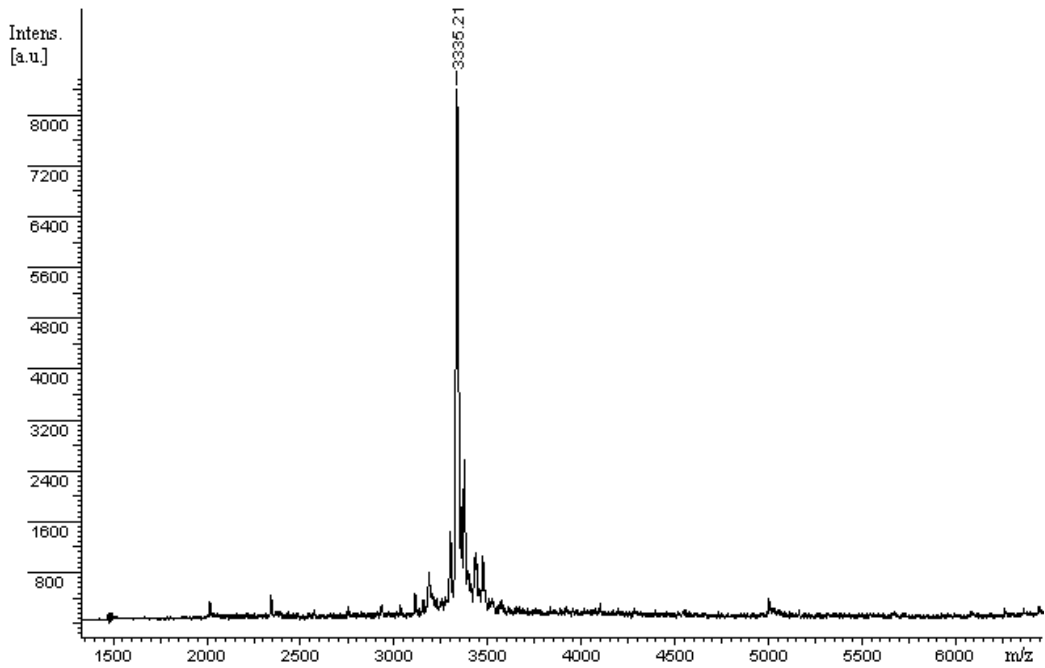

# HEX-11D-PD

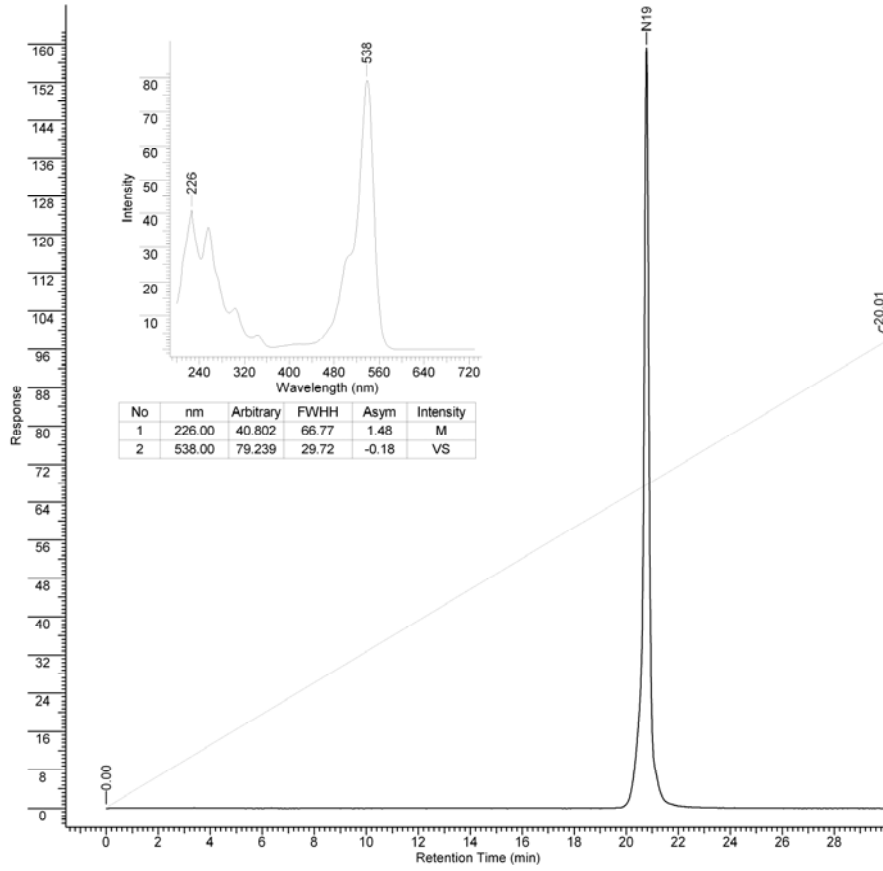

| Name | tR     | Peak Area (Y units) | Area Percent | Width | Asymmetry | Plate Number |
|------|--------|---------------------|--------------|-------|-----------|--------------|
| N19  | 20.773 | 2426446.500         | 100.000      | 0.308 | 1.067     | 72568.461    |

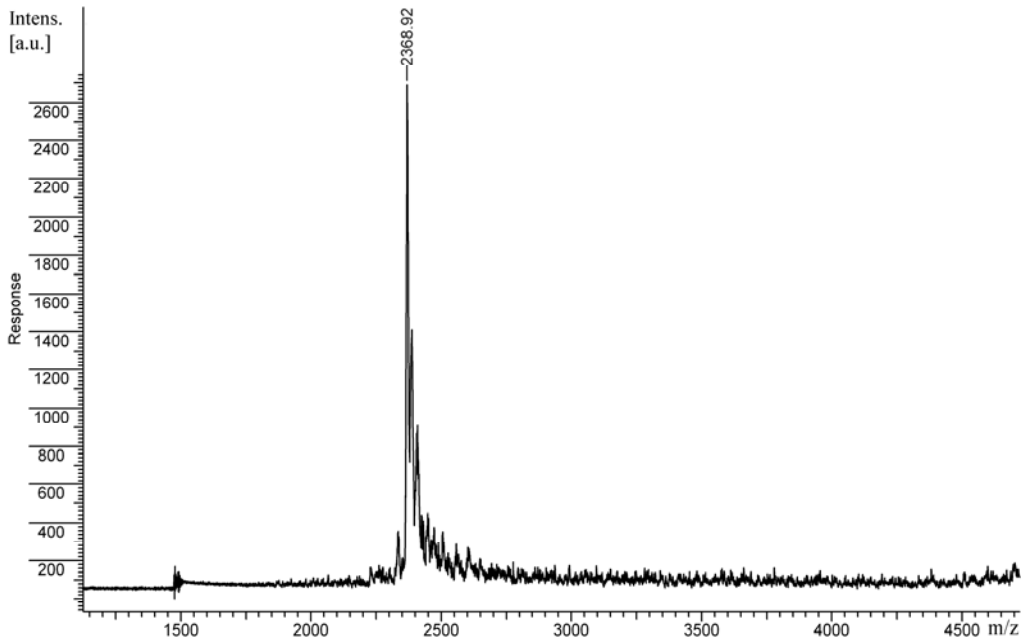

# HEX-11D-PD1

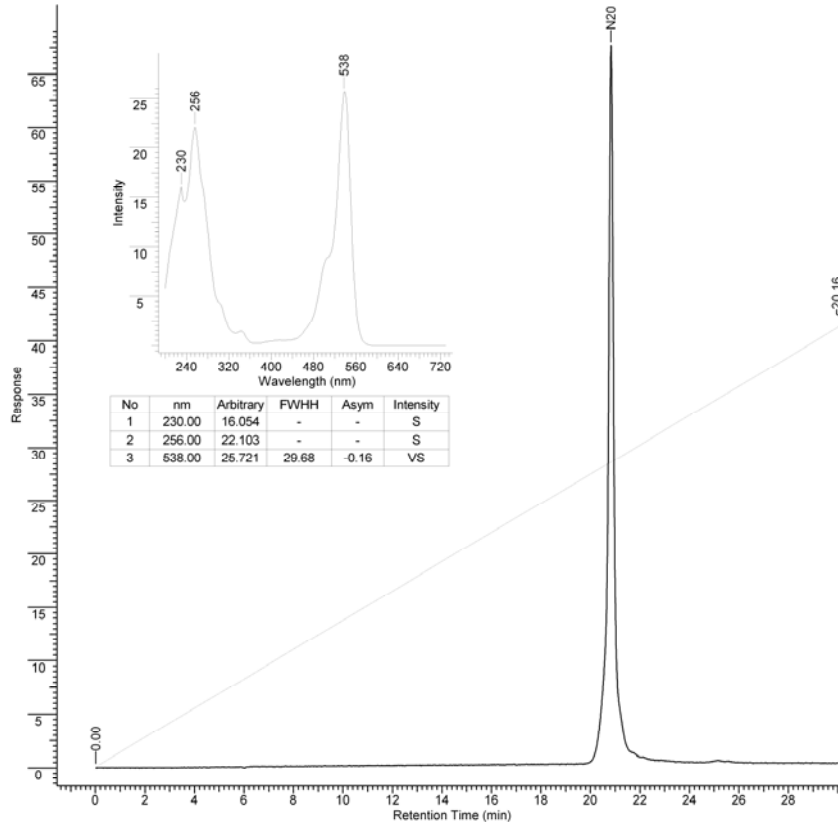

| Name | tR     | Peak Area (Y units) | Area Percent | Width | Asymmetry | Plate Number |
|------|--------|---------------------|--------------|-------|-----------|--------------|
| N20  | 20.831 | 1156564.000         | 100.000      | 0.342 | 1.073     | 59188.613    |

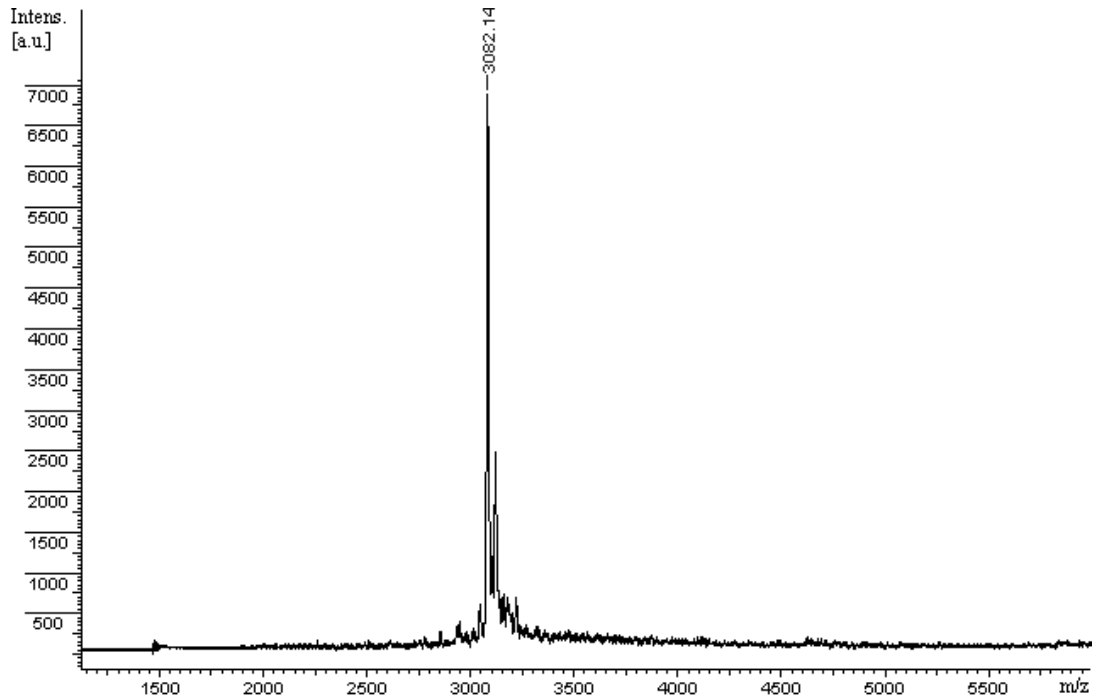

# HEX-11D-PD2

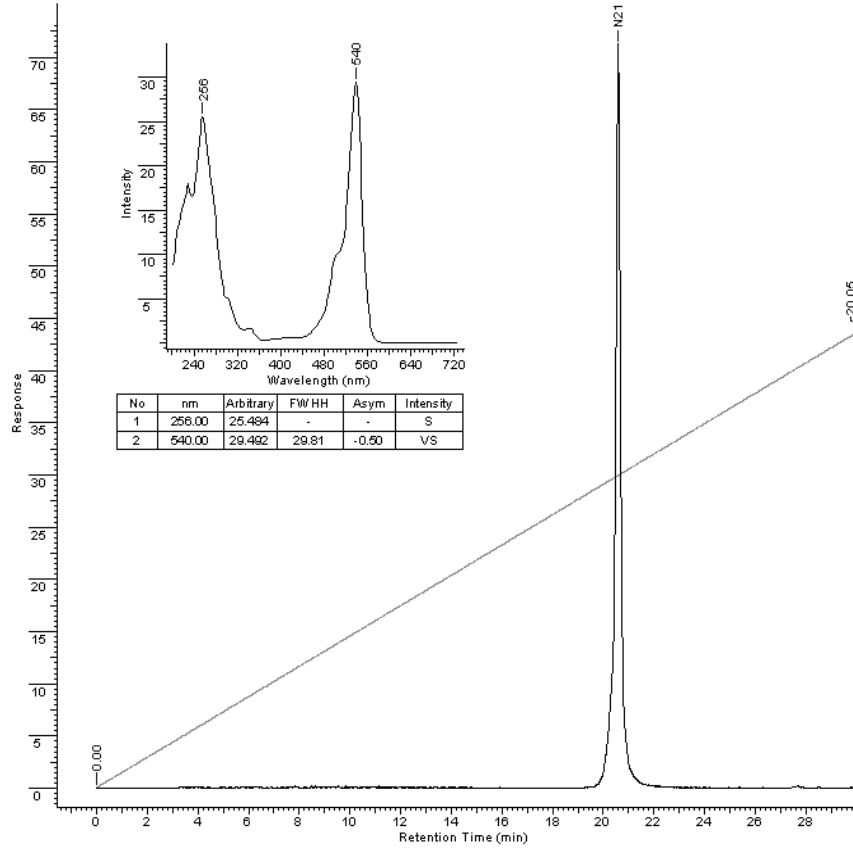

| Name | tR     | Peak | Area (Y units) | Area Percent | Width | Asymmetry | Plate Number |
|------|--------|------|----------------|--------------|-------|-----------|--------------|
| N21  | 20.593 |      | 1065941.500    | 100.000      | 0.322 | 1.037     | 66270.320    |

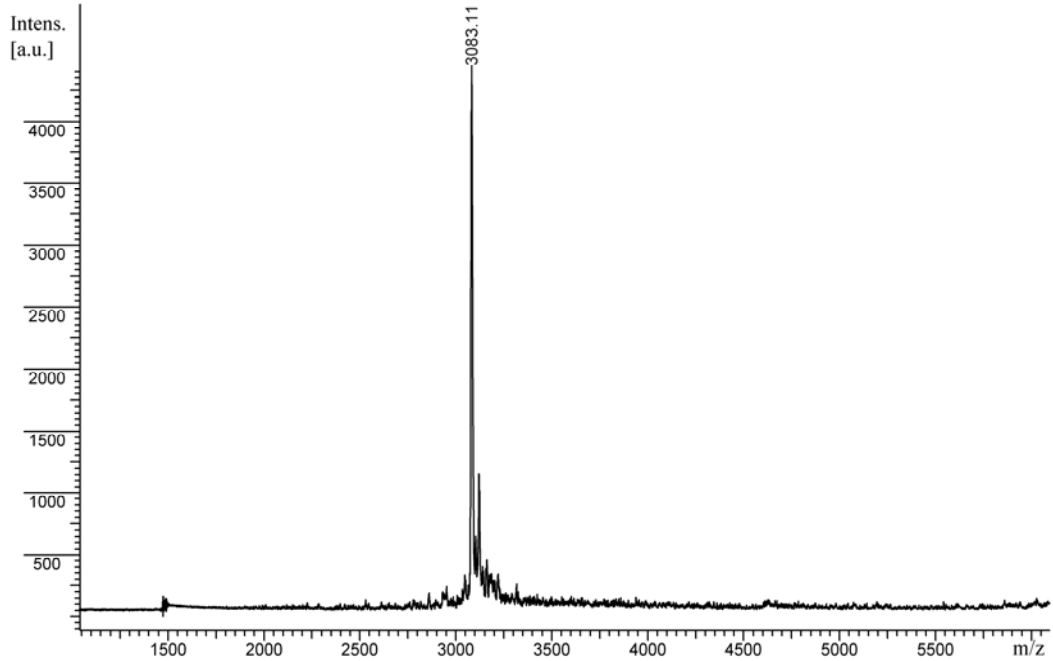

# 11M-E

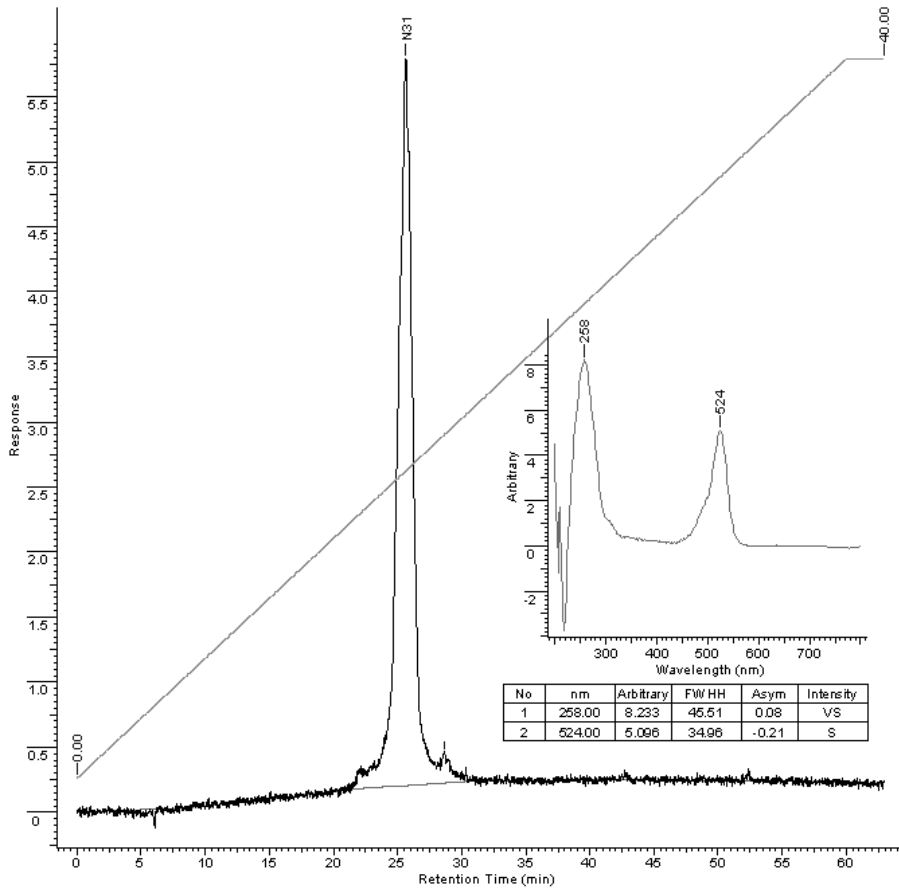

| No. | Name    | tR     | Peak Area (Y units/mg) | Area Percent |
|-----|---------|--------|------------------------|--------------|
| 1   | N31     | 28.633 | 439455.000             | 98.671       |
| 2   | unknown | 28.633 | 5905.575               | 1.329        |

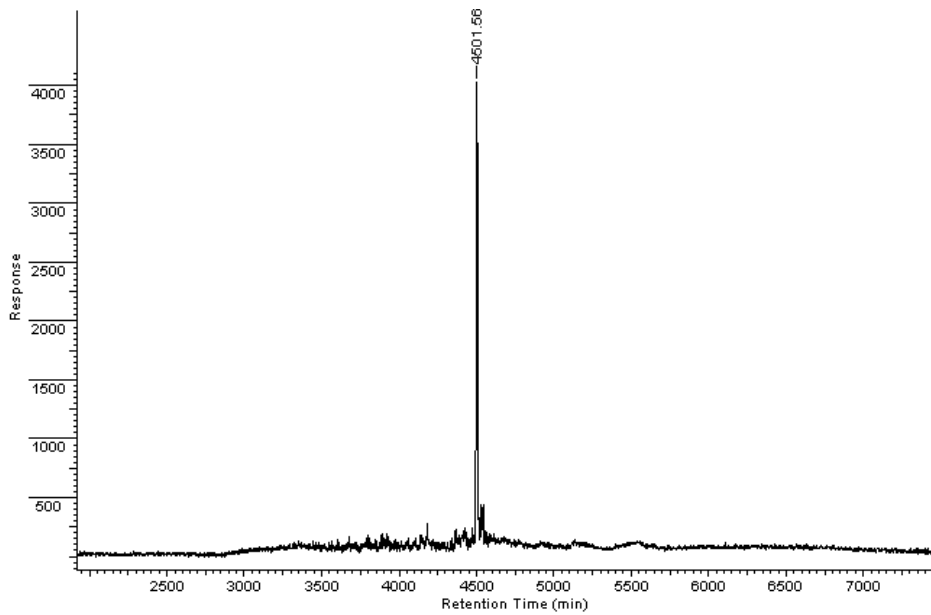

# HEX-11M

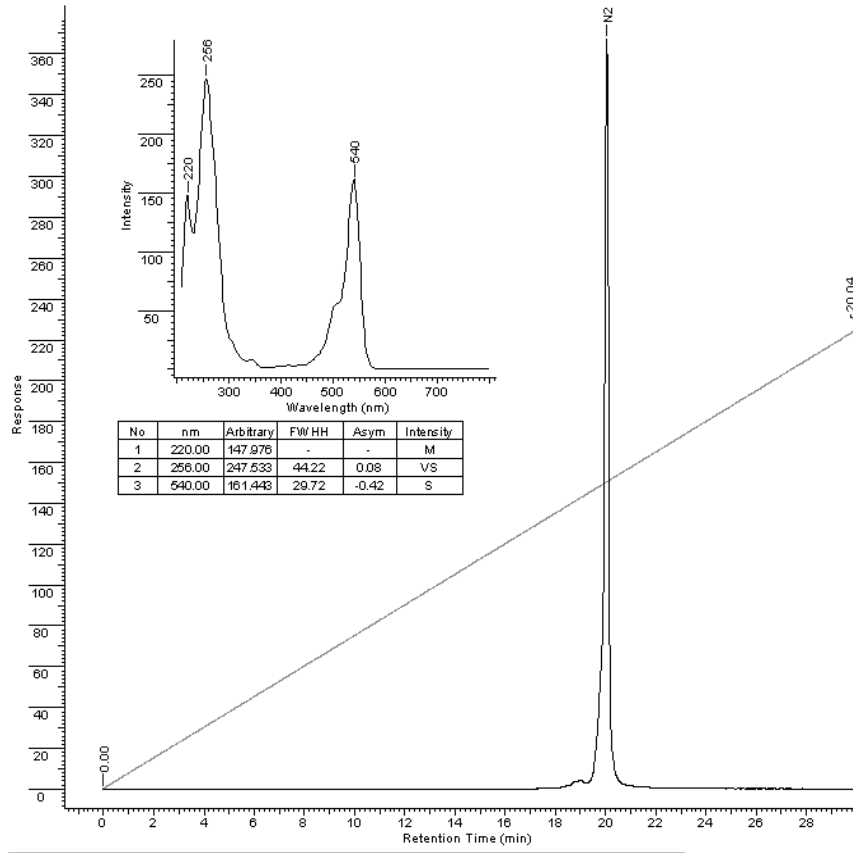

| Name | tr     | Peak Area (Y units) | Area Percent | Width | Asymmetry | Plate Number |
|------|--------|---------------------|--------------|-------|-----------|--------------|
| N2   | 20.047 | 4743072.500         | 100.000      | 0.277 | 0.891     | 83963.758    |

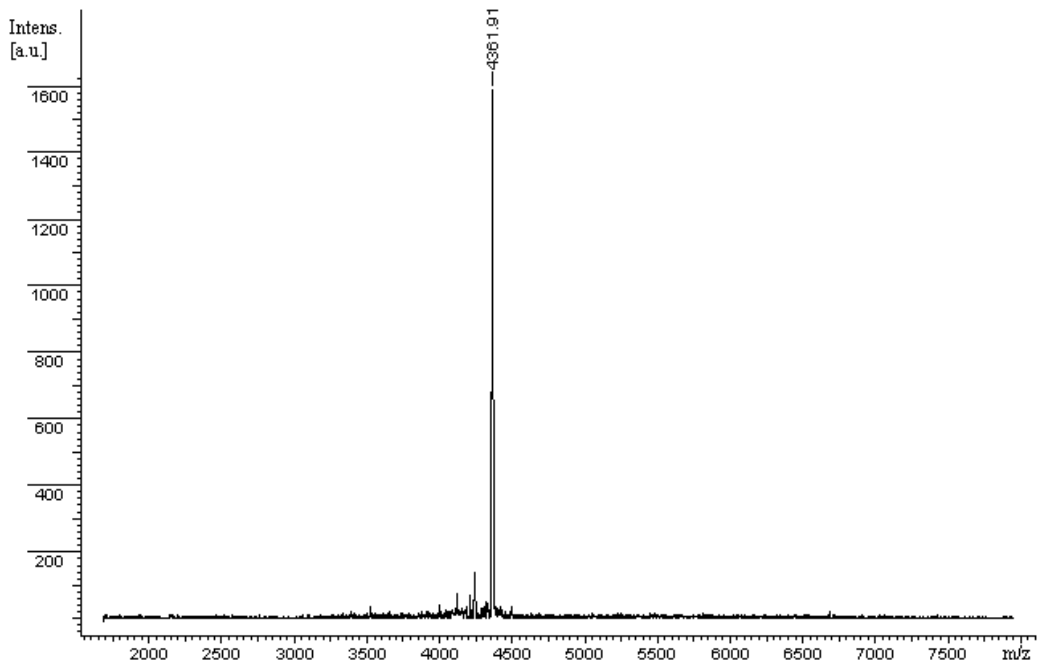

# HEX-11MS

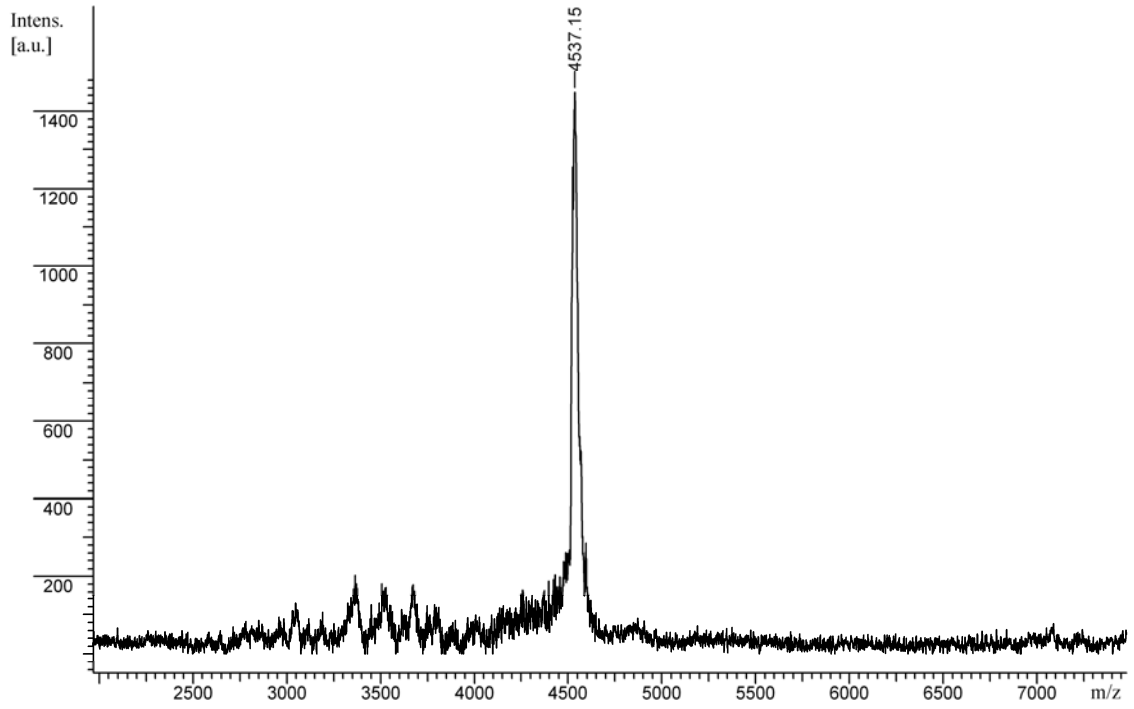

# HEX-11MS-Ole

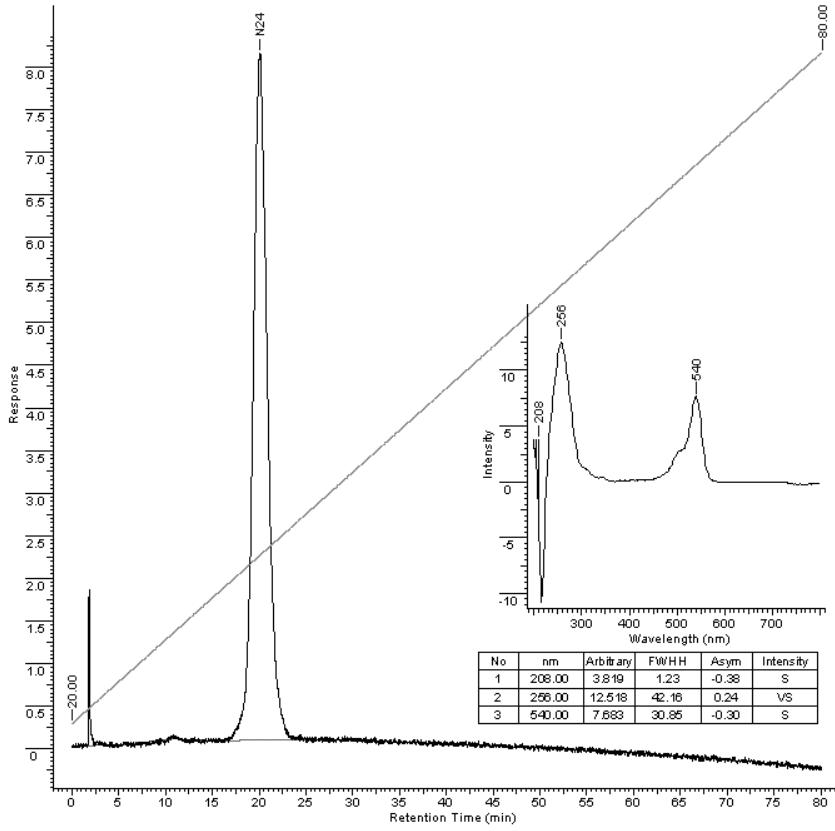

| Name | IR     | Peak Area (Y units/ms) | Area Percent | Width | Asymmetry | Plate Number |
|------|--------|------------------------|--------------|-------|-----------|--------------|
| N24  | 20.064 | 836683.625             | 100.000      | 2.378 | 1.173     | 1138.895     |

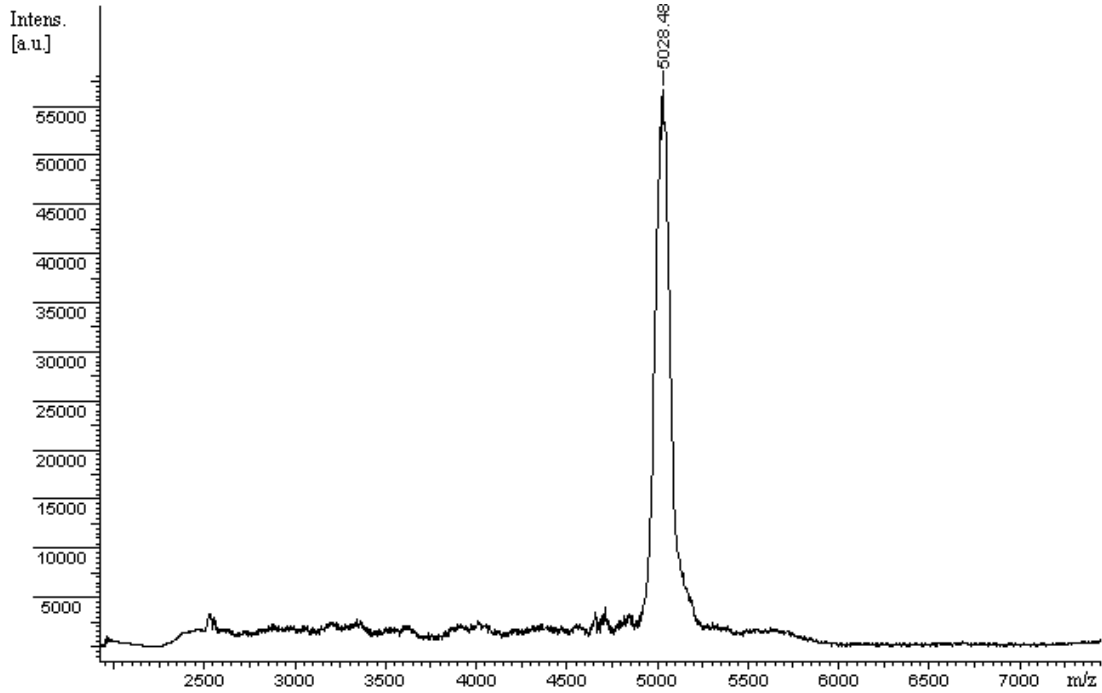

Supplement: ml200066k_si_001.pdf [file ml200066k_si_001.pdf]
